# Supplementary material for: Hemocyte differentiation to the megacyte lineage enhances mosquito immunity against Plasmodium
Source: eLife. 2022 Sep 2;11:e81116. doi: 10.7554/eLife.81116 (PMC9545522; doi:10.7554/eLife.81116)
Supplement: Supplementary file 1. [file elife-81116-supp1.xlsx]

## Sheet: Sheet1
Upregulated genes by Cactus Knockdown
Accesion Number	Name	Description	baseMean	log2FoldChange	lfcSE	stat	pvalue	padj	Hemocyte type
AGAP007343	LYSC2	C-type lysozyme	150004	11.3899	0.890888	12.7848	1.9931e-37	3.07315e-36
AGAP011920	AGAP011920	eupolytin	147.238	10.2402	0.850232	12.044	2.08583e-33	2.77551e-32
AGAP002842	AGAP002842	CLIPD1 protein	908.023	9.35827	0.461471	20.2792	1.96213e-91	1.31101e-89
AGAP006674	AGAP006674	chymotrypsin-like protease (Precursor)	162.651	9.2232	1.26976	7.26375	3.76504e-13	1.82743e-12
AGAP000188	AGAP000188	Uridine phosphorylase [Source:UniProtKB/TrEMBL;Acc:Q7PFX7]	35514.6	8.22333	0.206854	39.7543	0	0
AGAP010771	AGAP010771	nan	212.624	7.8358	0.779798	10.0485	9.32865e-24	8.12248e-23
AGAP028044	CPLCP23	cuticular protein (putative) CPLCP23	568.691	7.78205	0.423632	18.3698	2.29124e-75	1.07392e-73
AGAP028137	CPLCP17	cuticular protein (putative) CPLCP17	23.1516	7.74812	0.894498	8.66198	4.63649e-18	3.05885e-17
AGAP009728	AGAP009728	ficolin	96.0329	7.55216	0.734283	10.2851	8.22802e-25	7.47504e-24
AGAP012936	nan	nan	771.778	7.37696	0.577742	12.7686	2.45525e-37	3.76725e-36
AGAP010256	AGAP010256	nan	24.4195	6.82626	0.892934	7.64475	2.09349e-14	1.10678e-13
AGAP004497	AGAP004497	nan	140.093	6.7239	0.776063	8.66411	4.55041e-18	3.00416e-17
AGAP009489	AGAP009489	Cytidine deaminase [Source:UniProtKB/TrEMBL;Acc:Q7QG43]	26454.7	6.7102	0.127645	52.5693	0	0
AGAP002007	AGAP002007	reticulon/nogo receptor	10.8228	6.63825	0.923463	7.18843	6.55383e-13	3.1326e-12
AGAP029133	AGAP029133	nan	150.526	6.56522	0.474005	13.8505	1.26291e-43	2.4232e-42
AGAP011980	AGAP011980	nan	120.765	6.52287	0.556578	11.7196	1.0115e-31	1.25882e-30
AGAP008341	AGAP008341	serine/threonine-protein kinase Chk2	412.098	6.51915	0.327414	19.911	3.265e-88	2.10682e-86
AGAP028008	CPLCP19	cuticular protein (putative) CPLCP19	26.3228	6.43383	0.790844	8.13539	4.10606e-16	2.42528e-15
AGAP004115	AGAP004115	cystinosin	4407.48	6.41375	0.197665	32.4476	5.86344e-231	3.06886e-228
AGAP007150	AGAP007150	nan	11.3546	6.22264	0.900634	6.90918	4.87476e-12	2.19108e-11
AGAP001002	AGAP001002	Toll protein	116128	6.17763	0.268236	23.0306	2.30373e-117	2.78249e-115	Megacytes
AGAP013210	AGAP013210	Down syndrome cell adhesion molecule-like protein 1	104.717	6.17745	0.853967	7.23383	4.69558e-13	2.2674e-12
AGAP000473	AGAP000473	Aa_trans domain-containing protein [Source:UniProtKB/TrEMBL;Acc:Q7QFG5]	32.725	6.0308	0.69411	8.68853	3.67151e-18	2.43244e-17
AGAP011226	AGAP011226	nan	2959.79	6.02311	0.218447	27.5724	2.3834e-167	5.22186e-165	Megacytes
AGAP028013	CPLCP25	cuticular protein (putative) CPLCP25	9.86924	5.98271	0.911017	6.56707	5.13155e-11	2.15342e-10
AGAP028178	CPLCP13	cuticular protein (putative) CPLCP13	9.84575	5.90362	0.934992	6.31409	2.71756e-10	1.07617e-09
AGAP012544	CASPS14	short caspase 14	9.24757	5.88732	0.910161	6.46844	9.90198e-11	4.0489e-10
AGAP006982	AGAP006982	nan	7.3374	5.81487	0.975477	5.96105	2.50615e-09	9.02885e-09
AGAP013142	AGAP013142	nan	213.69	5.78629	0.403778	14.3304	1.41333e-46	2.93929e-45
AGAP028156	CPLCP14	cuticular protein (putative) CPLCP14	6.34451	5.78075	0.982548	5.88343	4.0185e-09	1.42164e-08
AGAP006368	Obp69	odorant-binding protein 69	42.2056	5.74398	0.556558	10.3206	5.68947e-25	5.26527e-24
AGAP001508	AGAP001508	nan	5677.72	5.67372	0.632767	8.96652	3.06039e-19	2.14843e-18
AGAP010833	CLIPB14	CLIP-domain serine protease	350.173	5.6093	0.696699	8.05126	8.19441e-16	4.75953e-15
AGAP005101	AGAP005101	nan	828.528	5.56133	0.314177	17.7013	4.10099e-70	1.6798e-68
AGAP009918	AGAP009918	SGS5 [Source:UniProtKB/TrEMBL;Acc:Q5XLG6]	7.33031	5.54612	0.960927	5.77164	7.85055e-09	2.69436e-08
AGAP009917	AGAP009917	SGS4 [Source:UniProtKB/TrEMBL;Acc:Q5XLG7]	7.64146	5.50153	0.991756	5.54726	2.90179e-08	9.41058e-08
AGAP005072	AGAP005072	nan	28.8705	5.47858	0.74764	7.32784	2.33894e-13	1.14528e-12
AGAP011232	AGAP011232	nan	5.10931	5.47217	0.983504	5.56395	2.63739e-08	8.59751e-08
AGAP009916	nan	nan	2842.25	5.41088	0.265188	20.404	1.5414e-92	1.07567e-90
AGAP010811	AGAP010811	Fibrinogen C-terminal domain-containing protein [Source:UniProtKB/TrEMBL;Acc:A0A1S4H516]	91.0141	5.25687	0.79653	6.59971	4.11964e-11	1.73885e-10
AGAP028060	AGAP028060	glucuronosyltransferase	887.337	5.22818	0.245625	21.2852	1.55579e-100	1.30867e-98
AGAP028032	AGAP028032	nan	11.1465	5.22663	0.835531	6.25545	3.96362e-10	1.552e-09
AGAP013201	AGAP013201	nan	32.2763	5.15954	0.608927	8.47317	2.38797e-17	1.51089e-16
AGAP011578	nan	nan	408.18	5.11331	0.232704	21.9734	5.17198e-107	5.18353e-105
AGAP010398	AGAP010398	Flavin-containing monooxygenase FMO GS-OX-like 1	2219.57	5.04211	0.295949	17.0371	4.35976e-65	1.51005e-63
AGAP000745	AGAP000745	nan	12.3359	5.01749	0.784369	6.39685	1.58614e-10	6.39135e-10
AGAP013059	AGAP013059	nan	312.695	4.98308	0.225695	22.0788	5.05325e-108	5.2315e-106
AGAP008235	AGAP008235	nan	4.82695	4.97907	0.993875	5.00976	5.44991e-07	1.56297e-06
AGAP008851	AGAP008851	E3 ubiquitin-protein ligase mind-bomb [Source:UniProtKB/TrEMBL;Acc:A0A1S4GZF1]	12042.4	4.95866	0.145571	34.0634	2.56677e-254	1.86012e-251
AGAP013480	AGAP013480	nan	3.59037	4.89125	1.07064	4.56853	4.91163e-06	1.27192e-05
AGAP011576	nan	nan	172.842	4.88498	0.273107	17.8867	1.49763e-71	6.327e-70
AGAP028432	AGAP028432	nan	29.9948	4.85263	0.697149	6.96067	3.38651e-12	1.54351e-11
AGAP028138	AGAP028138	nan	5559.35	4.83857	0.154182	31.3823	3.532e-216	1.44674e-213
AGAP002291	AGAP002291	ebony	1221.91	4.82194	0.298909	16.1318	1.52515e-58	4.64997e-57
AGAP001767	AGAP001767	Peptidase (mitochondrial processing) beta	29.3046	4.8081	0.539067	8.9193	4.69232e-19	3.25526e-18
AGAP004382	GSTD3	glutathione S-transferase delta class 3	301.64	4.78296	0.392783	12.1771	4.11608e-34	5.64448e-33
AGAP001763	Fatp	fatty acid transporter protein 1	1430.27	4.76324	0.168815	28.2157	3.74827e-175	9.5439e-173
AGAP029077	AGAP029077	nan	20.5479	4.7311	0.610346	7.7515	9.08159e-15	4.96274e-14
AGAP007216	AGAP007216	DE-cadherin	328.682	4.71211	0.212536	22.1709	6.56004e-109	6.8669e-107
AGAP004316	AGAP004316	nan	4851.5	4.66854	0.296069	15.7684	5.13164e-56	1.44746e-54
AGAP012581	AGAP012581	nan	30.4494	4.64773	0.491782	9.45079	3.3627e-21	2.61602e-20
AGAP007666	AGAP007666	calcyphosin-like protein	10259.1	4.62966	0.250532	18.4793	3.03062e-76	1.47935e-74
AGAP012529	GALE8	galectin 8	209.484	4.61403	0.248139	18.5946	3.55625e-77	1.80126e-75
AGAP001753	AGAP001753	15-hydroxyprostaglandin dehydrogenase (NAD)	34.7416	4.54899	0.497562	9.14256	6.09884e-20	4.46443e-19
AGAP005205	PGRPLA	peptidoglycan recognition protein (long)	4109.11	4.51966	0.212617	21.2573	2.82035e-100	2.35137e-98
AGAP011225	AGAP011225	nan	57.346	4.51336	0.36446	12.3837	3.20275e-35	4.57862e-34
AGAP010385	AGAP010385	nan	86.0702	4.50519	0.34446	13.079	4.34262e-39	7.05376e-38
AGAP010390	COE12O	carboxylesterase	1082.62	4.50345	0.216708	20.7812	6.40693e-96	4.79045e-94
AGAP007684	AGAP007684	Tubulointerstitial nephritis antigen	2986.01	4.50091	0.167962	26.7972	3.48466e-158	6.6998e-156
AGAP013179	AGAP013179	nan	1393.54	4.50087	0.178478	25.2181	2.53673e-140	3.98308e-138
AGAP001509	AGAP001509	nan	15.6676	4.47348	0.763042	5.86269	4.55426e-09	1.60515e-08
AGAP006345	AGAP006345	nan	50.696	4.40143	0.408313	10.7796	4.29959e-27	4.40287e-26
AGAP001679	nan	nan	75.511	4.39396	0.371476	11.8284	2.78428e-32	3.56396e-31
AGAP013382	AGAP013382	nan	4.61087	4.37926	0.988668	4.42946	9.44711e-06	2.36391e-05
AGAP000667	AGAP000667	G_PROTEIN_RECEP_F1_2 domain-containing protein [Source:UniProtKB/TrEMBL;Acc:A0A1W5KQ45]	10.9669	4.37549	0.821273	5.32769	9.94704e-08	3.06145e-07
AGAP000133	AGAP000133	nan	26.7434	4.37251	0.550486	7.943	1.97351e-15	1.11868e-14
AGAP029075	AGAP029075	nan	6.60842	4.33156	0.975053	4.44238	8.89689e-06	2.23394e-05
AGAP001061	AGAP001061	nan	12.8658	4.32321	0.693516	6.23375	4.55401e-10	1.7736e-09
AGAP001705	AGAP001705	nan	598.504	4.27084	0.189638	22.521	2.58341e-112	2.76572e-110
AGAP002232	GPR5HT2A	putative serotonin 5HT-2a receptor	4.62764	4.25586	0.980579	4.34015	1.42383e-05	3.47781e-05
AGAP010818	AGAP010818	nan	263.076	4.25345	0.304341	13.9759	2.18581e-44	4.25466e-43
AGAP006367	AGAP006367	nan	7339.22	4.18668	0.128032	32.7003	1.54567e-234	9.10112e-232	Prohemocytes and Megacytes
AGAP028652	AGAP028652	nan	83.3345	4.18024	0.305183	13.6975	1.05071e-42	1.92957e-41
AGAP013194	AGAP013194	nan	26.7318	4.17995	0.51495	8.11719	4.77106e-16	2.79702e-15
AGAP028742	AGAP028742	nan	5.52607	4.17174	0.93605	4.45675	8.32133e-06	2.09781e-05
AGAP010816	TEP3	thioester-containing protein 3	62660.7	4.1535	0.220729	18.8172	5.45532e-79	2.90365e-77	AM granulocytes
AGAP010709	CTL2	C-type lectin (CTL)	6.96291	4.14932	0.815225	5.08979	3.58466e-07	1.05108e-06
AGAP012787	AGAP012787	nan	4.25996	4.14132	1.09866	3.76944	0.000163612	0.000351819
AGAP001004	TOLL1A	TOLL-like receptor 1A	757.491	4.10594	0.211677	19.3972	8.1483e-84	4.95259e-82
AGAP004181	AGAP004181	Fibroblast growth factor [Source:UniProtKB/TrEMBL;Acc:A0NDD8]	108.393	4.08203	0.282219	14.464	2.045e-47	4.37863e-46
AGAP012748	AGAP012748	nan	226.231	4.07691	0.198811	20.5064	1.88758e-93	1.34719e-91
AGAP001048	AGAP001048	nan	8.56962	4.07377	0.777939	5.23662	1.63546e-07	4.9431e-07
AGAP009590	AGAP009590	amiloride-sensitive sodium channel, other	25.0899	4.02771	0.489815	8.22292	1.98614e-16	1.19029e-15
AGAP010617	AGAP010617	nan	5.18741	4.01477	1.08108	3.71367	0.000204278	0.000434229
AGAP010869	AGAP010869	fibrinogen	211.819	4.01427	0.504674	7.95418	1.80322e-15	1.0271e-14
AGAP002591	AGAP002591	nan	68.1857	4.00971	0.350557	11.4381	2.69648e-30	3.21564e-29
AGAP028424	AGAP028424	nan	12.4434	3.95074	0.655787	6.02443	1.69711e-09	6.2309e-09
AGAP012172	nan	nan	61.2009	3.94241	0.357272	11.0348	2.59727e-28	2.80606e-27
AGAP004170	AGAP004170	nan	861.687	3.93694	0.203078	19.3863	1.00645e-83	6.07804e-82
AGAP028574	AGAP028574	nan	25.1527	3.91423	0.46645	8.39151	4.79918e-17	2.9765e-16
AGAP012011	AGAP012011	nan	608.391	3.90985	0.18647	20.9678	1.29162e-97	9.893e-96
AGAP004837	nan	nan	911.904	3.9052	0.209914	18.6038	2.99138e-77	1.52334e-75
AGAP010387	AGAP010387	alanine-glyoxylate aminotransferase	208.99	3.89851	0.710015	5.49074	4.00258e-08	1.28566e-07
AGAP000835	AGAP000835	nan	14.198	3.89148	0.789899	4.92655	8.36943e-07	2.35298e-06
AGAP013005	AGAP013005	nan	48169.7	3.88984	0.269699	14.4229	3.71455e-47	7.88171e-46
AGAP009155	AGAP009155	nan	28.7505	3.87575	0.429856	9.01639	1.94381e-19	1.38105e-18
AGAP012171	nan	nan	322.369	3.86477	0.211464	18.2763	1.27892e-74	5.87741e-73
AGAP011654	AGAP011654	membrane dipeptidase	317.543	3.86462	0.36442	10.6049	2.82902e-26	2.77338e-25
AGAP006520	AGAP006520	Fatty acid elongase 2	285.471	3.79574	0.201231	18.8626	2.3148e-79	1.25332e-77
AGAP010855	AGAP010855	solute carrier family 45, member 1/2/4	26.9499	3.768	0.456747	8.24963	1.58886e-16	9.55852e-16
AGAP010542	dpr6	defective proboscis extension response 6	13.8728	3.76504	0.579086	6.5017	7.94196e-11	3.26588e-10
AGAP006986	AGAP006986	nan	63.9507	3.76057	0.528657	7.11344	1.13189e-12	5.30788e-12
AGAP010851	GPRLKK	putative leukokinin receptor	19.0268	3.75365	0.506383	7.41266	1.23788e-13	6.19006e-13
AGAP009050	AGAP009050	cyclic nucleotide gated channel, invertebrate	4.97135	3.75187	0.968715	3.87303	0.00010749	0.000236936
AGAP004574	AGAP004574	nan	181.298	3.73453	0.274374	13.6111	3.4412e-42	6.22257e-41
AGAP010240	ESP	late trypsin	7.68485	3.7001	0.726459	5.09334	3.51801e-07	1.0325e-06
AGAP012588	AGAP012588	nan	4.07085	3.69962	0.90731	4.07757	4.55092e-05	0.000104929
AGAP006449	AGAP006449	nan	6.57735	3.69775	0.773327	4.78161	1.73896e-06	4.72397e-06
AGAP005949	AGAP005949	2-acylglycerol O-acyltransferase 2	1869.72	3.68984	0.154002	23.9597	7.31955e-127	9.99383e-125
AGAP001376	SRPN17	serine protease inhibitor (serpin) 17	2134.99	3.68553	0.244477	15.0751	2.36029e-51	5.67252e-50
AGAP009467	ABCG16	ATP-binding cassette transporter (ABC transporter) family G member 16 [Source:UniProtKB/TrEMBL;Acc:A0A1S4H190]	162.679	3.6586	0.277058	13.2052	8.18902e-40	1.36065e-38
AGAP007356	AGAP007356	CRAL-TRIO domain-containing protein [Source:UniProtKB/TrEMBL;Acc:Q7QJ86]	7.42829	3.65056	0.796475	4.58339	4.57496e-06	1.1899e-05
AGAP011355	AGAP011355	nan	1146.69	3.63288	0.329791	11.0157	3.21012e-28	3.44841e-27
AGAP010294	AGAP010294	nan	8.97857	3.63195	0.691395	5.25307	1.49581e-07	4.53557e-07
AGAP003627	AGAP003627	nan	312.597	3.59177	0.332455	10.8038	3.30385e-27	3.39799e-26
AGAP007858	AGAP007858	lysyl-tRNA synthetase, class II	435.166	3.58535	0.19888	18.0278	1.17995e-72	5.17035e-71
AGAP007262	AGAP007262	chymotrypsin-like protease	3.01764	3.58317	1.00831	3.55364	0.000379936	0.00077392
AGAP010759	AGAP010759	nan	9550.05	3.58103	0.22703	15.7734	4.74312e-56	1.34189e-54	Megacytes
AGAP028541	AGAP028541	nan	41.489	3.57616	0.389605	9.17892	4.35456e-20	3.20503e-19
AGAP005285	AGAP005285	nan	388.967	3.56621	0.164647	21.6598	4.91209e-104	4.58186e-102
AGAP010760	AGAP010760	nan	12109.6	3.52948	0.223694	15.7782	4.39494e-56	1.24713e-54
AGAP005742	AGAP005742	semaphorin	54.7356	3.52922	0.331256	10.654	1.66952e-26	1.65216e-25
AGAP003139	SRPN9	serine protease inhibitor (serpin) 9	3098.84	3.52852	0.121724	28.9878	9.37261e-185	2.67574e-182
AGAP013487	AGAP013487	nan	95.575	3.52552	0.378351	9.31814	1.18401e-20	8.96672e-20
AGAP006985	AGAP006985	nan	98.6841	3.5253	0.447249	7.8822	3.21663e-15	1.80273e-14
AGAP007318	TM7318	Transmembrane protein - megacyte marker	7478.16	3.51995	0.22982	15.3161	5.96704e-53	1.52346e-51	Megacytes
AGAP006343	PGRPS2	peptidoglycan recognition protein (short)	19.3625	3.50921	0.504348	6.95791	3.45357e-12	1.57179e-11
AGAP005756	COEAE1D	carboxylesterase	287.512	3.50589	0.25324	13.8441	1.38037e-43	2.63248e-42
AGAP003892	AGAP003892	solute carrier family 29 (equilibrative nucleoside transporter), member 1/2/3	7735.65	3.50546	0.180513	19.4194	5.28759e-84	3.2347e-82
AGAP028094	AGAP028094	nan	102.587	3.48274	0.328566	10.5998	2.98548e-26	2.92372e-25
AGAP012321	OBP26	odorant-binding protein 26	8.06947	3.45936	0.707433	4.89003	1.00823e-06	2.80855e-06
AGAP000976	AGAP000976	nan	20.967	3.45651	0.483776	7.14486	9.00885e-13	4.26923e-12
AGAP006603	AGAP006603	nan	253.685	3.45472	0.226954	15.2221	2.52318e-52	6.35586e-51
AGAP001652	AGAP001652	lipase	33397.9	3.44608	0.120095	28.6947	4.44773e-181	1.23241e-178	Megacytes
AGAP005440	AGAP005440	nan	11.5373	3.44146	0.637011	5.40251	6.57149e-08	2.06298e-07
AGAP010762	nan	nan	723.839	3.43815	0.215668	15.9419	3.24522e-57	9.55415e-56
AGAP010675	LRIM18	leucine-rich immune protein (Coil-less)	554.063	3.39475	0.219685	15.4528	7.21887e-54	1.88914e-52
AGAP008100	AGAP008100	Spire [Source:UniProtKB/TrEMBL;Acc:A0A1S4GX95]	465.338	3.38881	0.215974	15.6908	1.74799e-55	4.83674e-54
AGAP011063	AGAP011063	nan	11.664	3.37606	0.565509	5.96996	2.37315e-09	8.58251e-09
AGAP013117	AGAP013117	nan	4832.06	3.37437	0.226526	14.8962	3.49051e-50	8.05982e-49
AGAP002643	AGAP002643	nan	8.92678	3.36601	0.953296	3.53092	0.000414111	0.000838998
AGAP008403	AGAP008403	nan	307.803	3.34691	0.247523	13.5216	1.16541e-41	2.05605e-40
AGAP001005	AGAP001005	nan	10.898	3.34427	0.744618	4.49125	7.08057e-06	1.79898e-05
AGAP003318	AGAP003318	nan	146.408	3.33645	0.22007	15.1608	6.42345e-52	1.58003e-50
AGAP003319	AGAP003319	nan	10632.1	3.32704	0.138453	24.0301	1.3465e-127	1.86549e-125	Megacytes
AGAP028531	AGAP028531	nan	83.3804	3.32442	0.237709	13.9853	1.91783e-44	3.74076e-43
AGAP009424	AGAP009424	nan	709.915	3.31441	0.138854	23.8697	6.32434e-126	8.27522e-124
AGAP007290	AGAP007290	nan	35.6623	3.31151	0.51362	6.44739	1.13795e-10	4.63494e-10
AGAP003626	AGAP003626	nan	86.1591	3.30445	0.291439	11.3384	8.47065e-30	9.80368e-29
AGAP013166	Cht5-1	chitinase	464.38	3.29525	0.32753	10.0609	8.22295e-24	7.19967e-23
AGAP001648	CLIPB17	CLIP-domain serine protease	9264.85	3.29032	0.308997	10.6484	1.7745e-26	1.7542e-25
AGAP004243	AGAP004243	nan	16.5041	3.28942	0.589621	5.57887	2.42086e-08	7.92734e-08
AGAP004920	CASPS6	short caspase 6	720.388	3.26116	0.17504	18.631	1.80196e-77	9.27666e-76
AGAP010027	AGAP010027	nan	15.3175	3.25312	0.495851	6.56069	5.35584e-11	2.24056e-10
AGAP006641	nan	nan	46.0073	3.25201	0.29397	11.0624	1.90926e-28	2.07464e-27
AGAP004309	AGAP004309	solute carrier family 22	1105.67	3.23773	0.138469	23.3824	6.45546e-121	8.00222e-119
AGAP011667	AGAP011667	nan	17.1723	3.2023	0.615963	5.19885	2.00526e-07	6.01641e-07
AGAP001704	AGAP001704	isopentenyl-diphosphate delta-isomerase	1108.65	3.19451	0.0941132	33.9432	1.53525e-252	1.03312e-249
AGAP011560	AGAP011560	nan	7031.97	3.18638	0.119728	26.6136	4.72878e-156	8.24998e-154
AGAP005755	AGAP005755	DNA-binding protein D-ETS-3	17.0958	3.16703	0.487524	6.49616	8.23956e-11	3.38382e-10
AGAP003496	AGAP003496	nan	11011.7	3.15417	0.118491	26.6195	4.03227e-156	7.16756e-154
AGAP006689	AGAP006689	BTB (POZ) domain containing 9	269.56	3.13891	0.204998	15.3119	6.36816e-53	1.62147e-51
AGAP009490	AGAP009490	Necdin-like 2	456.036	3.13534	0.100399	31.2286	4.35558e-214	1.70974e-211
AGAP004335	AGAP004335	filamin	17572.1	3.13238	0.143729	21.7936	2.66615e-105	2.61644e-103
AGAP006642	nan	nan	158.542	3.12238	0.201036	15.5314	2.12546e-54	5.65649e-53
AGAP028005	AGAP028005	nan	24.091	3.11137	0.431624	7.20851	5.65658e-13	2.71614e-12
AGAP003839	AGAP003839	Fem-1 homolog c	2390.28	3.1047	0.0757174	41.0038	0	0
AGAP008671	AGAP008671	nan	138.2	3.09377	0.21508	14.3843	6.49408e-47	1.3626e-45
AGAP000235	AGAP000235	Thymosin	39370.3	3.09049	0.0786162	39.311	0	0	Megacytes
AGAP002677	AGAP002677	coiled-coil domain-containing protein lobo homolog	5.83211	3.09037	0.726378	4.25449	2.09525e-05	5.01126e-05
AGAP029047	CTL5	C-type lectin	8.47302	3.08319	0.680355	4.53174	5.84999e-06	1.50335e-05
AGAP013197	AGAP013197	nan	16.1985	3.07621	0.46849	6.56623	5.16066e-11	2.16371e-10
AGAP007289	OBP46	odorant-binding protein 46	59.8395	3.06568	0.296011	10.3566	3.90466e-25	3.64939e-24
AGAP007287	OBP47	odorant-binding protein 47	16.2486	3.06555	0.551291	5.56068	2.68726e-08	8.74193e-08
AGAP009184	AGAP009184	nan	731.534	3.06304	0.272886	11.2246	3.08626e-29	3.47795e-28
AGAP011389	AGAP011389	nan	31.1029	3.05229	0.396559	7.69694	1.39368e-14	7.46015e-14
AGAP005713	AGAP005713	nan	15.1054	3.05134	0.452593	6.74192	1.56307e-11	6.76733e-11
AGAP003249	CLIPB3	CLIP-domain serine protease	699.185	3.05082	0.238996	12.7651	2.56687e-37	3.93211e-36
AGAP007207	AGAP007207	nan	76.683	3.04942	0.257618	11.837	2.51352e-32	3.22614e-31
AGAP028615	AGAP028615	nan	129.359	3.04497	0.293551	10.3729	3.29431e-25	3.082e-24
AGAP004707	para	voltage-gated sodium channel	55.9961	3.04239	0.302149	10.0692	7.56181e-24	6.63313e-23
AGAP013034	IAP8	inhibitor of apoptosis 8	19.7361	3.02061	0.390512	7.73501	1.03394e-14	5.62399e-14
AGAP003186	AGAP003186	upstream stimulatory factor	79.934	3.00418	0.264086	11.3758	5.52159e-30	6.48615e-29
AGAP003495	AGAP003495	nan	7.87812	2.99931	0.664597	4.51298	6.39245e-06	1.63158e-05
AGAP006215	GPRMTH1	methuselah receptor 1	282.82	2.98038	0.199088	14.9702	1.15002e-50	2.71538e-49
AGAP010571	AGAP010571	nan	102.062	2.97237	0.209647	14.178	1.25391e-45	2.53499e-44
AGAP003656	AGAP003656	Terribly reduced optic lobes, isoform B [Source:UniProtKB/TrEMBL;Acc:A0A1S4GIT4]	33382.1	2.96955	0.233295	12.7287	4.09429e-37	6.22135e-36
AGAP029166	AGAP029166	nan	14302.2	2.95322	0.236675	12.478	9.84752e-36	1.43169e-34
AGAP009576	AGAP009576	collagen alpha 1	5.51998	2.94968	0.807848	3.65128	0.000260938	0.000545321
AGAP001169	Gr49	gustatory receptor 49	34.4742	2.94746	0.330979	8.90529	5.3247e-19	3.68311e-18
AGAP005729	AGAP005729	cyclin-dependent kinase 14	722.616	2.94622	0.136868	21.5261	8.872e-103	7.9603e-101
AGAP006690	AGAP006690	BTB (POZ) domain containing 9	6099.79	2.94379	0.17174	17.1409	7.35068e-66	2.64316e-64
AGAP008366	TEP2	thioester-containing protein 2	2622.05	2.94334	0.0858671	34.2779	1.67542e-257	1.57841e-254
AGAP010272	IR25a	ionotropic receptor IR25a	24.4642	2.94215	0.369958	7.95264	1.82583e-15	1.03934e-14
AGAP000786	AGAP000786	ZP domain-containing protein [Source:UniProtKB/TrEMBL;Acc:Q7QE77]	22.8741	2.92974	0.448888	6.52666	6.72515e-11	2.78617e-10
AGAP002802	AGAP002802	neural cell adhesion molecule	308.367	2.92466	0.224796	13.0103	1.06921e-38	1.7102e-37
AGAP010002	AGAP010002	nan	7.9049	2.92437	0.632889	4.62067	3.8251e-06	1.00351e-05
AGAP011294	DEF1	defensin anti-microbial peptide	9881.82	2.92236	0.525344	5.56276	2.65544e-08	8.64739e-08	AM granulocytes
AGAP012991	AGAP012991	Fascin [Source:UniProtKB/TrEMBL;Acc:F5HLZ2]	1219.27	2.91295	0.179343	16.2424	2.5301e-59	7.73898e-58
AGAP003120	AGAP003120	nan	11.1467	2.91091	0.538088	5.40972	6.31222e-08	1.98423e-07
AGAP013430	AGAP013430	nan	97.3163	2.90592	0.296411	9.80365	1.08585e-22	9.02894e-22
AGAP027980	ABCC10	ATP-binding cassette transporter (ABC transporter) family C member 10	393.423	2.90322	0.164223	17.6786	6.13514e-70	2.49134e-68
AGAP009212	SRPN6	serine protease inhibitor (serpin) 6	4770.19	2.89615	0.163757	17.6857	5.40539e-70	2.20451e-68
AGAP011391	AGAP011391	nan	67.7872	2.89048	0.296254	9.75675	1.72594e-22	1.41761e-21
AGAP011390	AGAP011390	nan	14.997	2.87564	0.573189	5.01691	5.2509e-07	1.50911e-06
AGAP005194	AGAP005194	nan	10.2357	2.86784	0.57015	5.02998	4.90525e-07	1.41365e-06
AGAP009049	Cht16	Chitinase [Source:UniProtKB/TrEMBL;Acc:A0A1S4GZY6]	18.1261	2.86604	0.581911	4.92523	8.4261e-07	2.3668e-06
AGAP010241	AGAP010241	gamma-glutamyltranspeptidase	43.7803	2.85091	0.310313	9.1872	4.03205e-20	2.97229e-19
AGAP012536	AGAP012536	nan	13.3393	2.83796	0.543015	5.2263	1.72936e-07	5.22022e-07
AGAP000628	AGAP000628	nan	95.1529	2.83489	0.327718	8.65039	5.13228e-18	3.37884e-17
AGAP012945	AGAP012945	CASPS4 protein	109.87	2.83419	0.222742	12.7241	4.34498e-37	6.58104e-36
AGAP013081	AGAP013081	nan	96.7731	2.83332	0.241522	11.7311	8.82695e-32	1.1029e-30
AGAP005547	AGAP005547	alpha-crystallin B chain	52.2838	2.82861	0.307739	9.19156	3.87187e-20	2.86318e-19
AGAP008368	TEP14	thioester-containing protein 14	9679.76	2.82686	0.179487	15.7496	6.9063e-56	1.93069e-54
AGAP010861	nan	nan	2139.68	2.82606	0.268618	10.5208	6.93128e-26	6.65643e-25
AGAP007917	ABCC12	ATP-binding cassette transporter (ABC transporter) family C member 12 [Source:UniProtKB/TrEMBL;Acc:A0A1S4GWP9]	7223.95	2.81323	0.147885	19.0231	1.09892e-80	6.27449e-79
AGAP013218	AGAP013218	sodium-independent sulfate anion transporter	1458.17	2.81239	0.137756	20.4158	1.21088e-92	8.51319e-91
AGAP009549	AGAP009549	nan	306.909	2.81062	0.221389	12.6954	6.27239e-37	9.43965e-36
AGAP013221	AGAP013221	nan	4538.41	2.7945	0.279014	10.0156	1.30129e-23	1.12266e-22
AGAP010479	AGAP010479	nan	459.392	2.79436	0.137436	20.3321	6.68316e-92	4.49729e-90
AGAP004483	AGAP004483	Lethal giant larvae	5028.82	2.77525	0.149956	18.5071	1.80876e-76	8.92164e-75
AGAP010417	AGAP010417	tetratricopeptide repeat protein 39B	2743.26	2.76658	0.159767	17.3163	3.54229e-67	1.29852e-65
AGAP000868	AGAP000868	beta-1,4-mannosyltransferase egghead protein	4835.1	2.75145	0.20238	13.5955	4.26049e-42	7.65994e-41
AGAP010328	AGAP010328	nan	36.4025	2.74875	0.366021	7.5098	5.92175e-14	3.01724e-13
AGAP006917	Gr55	gustatory receptor 55	63.2238	2.74279	0.343767	7.97863	1.47969e-15	8.45884e-15
AGAP006442	AGAP006442	nan	175.41	2.74222	0.32678	8.39163	4.79444e-17	2.97552e-16
AGAP009460	AGAP009460	c-Jun N-terminal kinase	258.877	2.73218	0.177904	15.3576	3.14826e-53	8.10377e-52
AGAP006342	PGRPS3	peptidoglycan recognition protein (short)	17.7498	2.72904	0.702853	3.8828	0.000103258	0.00022841
AGAP007685	AGAP007685	nan	1642.63	2.71975	0.128717	21.1296	4.24955e-99	3.33625e-97
AGAP007203	AGAP007203	DE-cadherin	681.383	2.71924	0.148618	18.2969	8.76545e-75	4.048e-73
AGAP013360	AGAP013360	nan	57.651	2.7057	0.434714	6.2241	4.84343e-10	1.87855e-09
AGAP005162	AGAP005162	nan	2522.37	2.70233	0.191958	14.0778	5.20386e-45	1.02779e-43
AGAP009984	AGAP009984	cell cycle control protein 50A	722.577	2.69129	0.149295	18.0267	1.20203e-72	5.24275e-71
AGAP001676	AGAP001676	actin, cytoplasmic	14.0597	2.67556	0.684284	3.91001	9.22909e-05	0.000205452
AGAP005100	Vps60	vacuolar protein sorting 60	4178.01	2.66799	0.0826523	32.2797	1.3498e-228	6.69288e-226
AGAP007080	AGAP007080	hexosaminidase	1438.18	2.65186	0.202726	13.081	4.22717e-39	6.8781e-38
AGAP004281	AGAP004281	nan	17.301	2.65113	0.484078	5.47666	4.33435e-08	1.38608e-07
AGAP005408	AGAP005408	nan	14.9386	2.64398	0.425277	6.21709	5.06472e-10	1.95954e-09
AGAP013066	AGAP013066	nan	12.6758	2.62954	0.493624	5.32702	9.98384e-08	3.06977e-07
AGAP005246	SRPN10	serine protease inhibitor (serpin) 10	11070.9	2.62864	0.0862374	30.4814	4.59662e-204	1.60388e-201	Megacytes
AGAP000784	AGAP000784	abhydrolase domain containing 4	3941.96	2.62778	0.0866887	30.3129	7.7597e-202	2.61086e-199
AGAP000307	AGAP000307	Integrin alpha-PS1	2265.81	2.62443	0.105589	24.8551	2.27974e-136	3.35585e-134
AGAP007036	APL1A	Anopheles Plasmodium-responsive Leucine-Rich Repeat 1A	1456.48	2.62365	0.264571	9.91663	3.52463e-23	2.9888e-22
AGAP006427	ABCC7	ATP-binding cassette transporter (ABC transporter) family C member 7	5329.59	2.62313	0.199548	13.1454	1.80954e-39	2.96481e-38
AGAP008940	AGAP008940	solute carrier family 6 (neurotransmitter transporter, GABA) member 6/8/11/12/	506.708	2.62271	0.200646	13.0713	4.80345e-39	7.77548e-38
AGAP012916	AGAP012916	nan	9061.55	2.61551	0.181323	14.4246	3.62423e-47	7.70741e-46	Granulocytes and Megacytes
AGAP013027	AGAP013027	Protein toll	9828.82	2.61168	0.210978	12.3789	3.39845e-35	4.84369e-34	Megacytes
AGAP005527	AGAP005527	PBPe domain-containing protein [Source:UniProtKB/TrEMBL;Acc:A0A1S4GQ96]	28.8617	2.60129	0.399993	6.50333	7.85627e-11	3.23488e-10
AGAP007156	AGAP007156	nan	7.99233	2.59173	0.624807	4.14805	3.35314e-05	7.84648e-05
AGAP001623	AGAP001623	nan	1089.66	2.58634	0.159004	16.2659	1.72313e-59	5.28783e-58
AGAP001647	AGAP001647	nan	13.9076	2.58487	0.700825	3.68833	0.000225731	0.000475965
AGAP011479	AGAP011479	hyaluronoglucosaminidase	59.9127	2.58325	0.25624	10.0814	6.67888e-24	5.87504e-23
AGAP013496	Cht5-3	chitinase	44.5741	2.58073	0.339742	7.59616	3.05055e-14	1.58956e-13
AGAP011653	AGAP011653	membrane dipeptidase	16.2974	2.57484	0.594794	4.32896	1.49812e-05	3.6498e-05
AGAP003247	CLIPB19	CLIP-domain serine protease	1759.95	2.5704	0.274299	9.37078	7.1998e-21	5.51458e-20
AGAP028842	SSU_rRNA_eukarya	Eukaryotic small subunit ribosomal RNA [Source:RFAM;Acc:RF01960]	90.2436	2.55653	0.711068	3.59534	0.000323967	0.000666834
AGAP013073	AGAP013073	nan	24.8152	2.5562	0.336847	7.58861	3.23344e-14	1.68114e-13
AGAP000163	GSTMS2	glutathione transferase microsomal 2	163.679	2.54758	0.223373	11.4051	3.94509e-30	4.66332e-29
AGAP003352	AGAP003352	Stomatin (EPB72)-like 3	5258.62	2.54616	0.186343	13.6638	1.67054e-42	3.05003e-41	Megacytes
AGAP007291	IAP4	inhibitor of apoptosis 4	154.244	2.54184	0.260408	9.76101	1.65498e-22	1.3629e-21
AGAP002326	AGAP002326	nan	10.0193	2.54171	0.605078	4.20064	2.66167e-05	6.29724e-05
AGAP004784	AGAP004784	fatty acyl-CoA reductase 2	1301.2	2.53747	0.135168	18.7727	1.26411e-78	6.69054e-77
AGAP012696	AGAP012696	Sulfotransferase (Sult)	300.866	2.52331	0.235357	10.7212	8.09429e-27	8.16449e-26
AGAP003790	ANXB9	annexin B9	7555.36	2.51324	0.223012	11.2695	1.85571e-29	2.11143e-28
AGAP012384	AGAP012384	nan	14.7048	2.5108	0.405424	6.19303	5.90192e-10	2.26669e-09
AGAP000651	Actin5C	Actin-5C [Source:UniProtKB/Swiss-Prot;Acc:P84185]	194466	2.5094	0.0703455	35.6725	1.05501e-278	1.65654e-275	Granulocytes and Megacytes
AGAP002270	CLIPB7	CLIP-domain serine protease	659.569	2.50762	0.252318	9.93832	2.83566e-23	2.41543e-22
AGAP007821	AGAP007821	nan	2115.81	2.50261	0.347011	7.21189	5.51785e-13	2.65765e-12
AGAP009745	AGAP009745	Sugar transporter ERD6-like 4	1788.52	2.50174	0.183736	13.616	3.21912e-42	5.83217e-41
AGAP006103	AGAP006103	nan	1120.04	2.49796	0.229282	10.8947	1.22164e-27	1.27312e-26
AGAP012677	AGAP012677	nan	683.975	2.49693	0.239767	10.414	2.14039e-25	2.02456e-24
AGAP006347	AGAP006347	potassium voltage-gated channel KQT-like subfamily, invertebrate	1199.51	2.49491	0.183478	13.5979	4.123e-42	7.42691e-41
AGAP009581	AGAP009581	collagen type I/II/III/V/XI/XXIV/XXVII alpha	15.2968	2.4879	0.442495	5.62244	1.88276e-08	6.23463e-08
AGAP007346	LYSC5	C-type lysozyme	26.593	2.48381	0.358168	6.93476	4.06914e-12	1.84216e-11
AGAP002262	AGAP002262	Adenylate cyclase 8 [Source:UniProtKB/TrEMBL;Acc:A0A1S4GF11]	517.941	2.48225	0.239224	10.3763	3.17909e-25	2.98309e-24
AGAP001021	AGAP001021	dihydropyrimidine dehydrogenase (NADP+)	6635.51	2.48123	0.185253	13.3938	6.57687e-41	1.13689e-39
AGAP005818	AGAP005818	nurim homolog	195.863	2.48085	0.165012	15.0344	4.37277e-51	1.04558e-49
AGAP008133	AGAP008133	Retinaldehyde binding protein 1 [Source:UniProtKB/TrEMBL;Acc:A0A1S4GY47]	11.8448	2.48022	0.483138	5.13356	2.84319e-07	8.40467e-07
AGAP004636	AGAP004636	sodium-independent sulfate anion transporter	404.589	2.47973	0.134484	18.4389	6.40869e-76	3.0493e-74
AGAP000998	AGAP000998	insulin-like growth factor 2 receptor	366.643	2.47505	0.142282	17.3955	8.9304e-68	3.35192e-66
AGAP010392	AGAP010392	calumenin	17468.4	2.46679	0.161962	15.2307	2.21131e-52	5.58519e-51
AGAP010175	AGAP010175	adenylyl cyclase-associated protein 1	10436	2.46045	0.0920421	26.7318	2.00839e-157	3.71001e-155	Megacytes
AGAP006732	nan	nan	7.47688	2.45411	0.695502	3.52854	0.000417864	0.000846237
AGAP011276	AGAP011276	nan	103.067	2.44528	0.229281	10.665	1.48389e-26	1.4731e-25
AGAP007035	APL1B	Anopheles Plasmodium-responsive Leucine-Rich Repeat 1B	1019.49	2.44376	0.276147	8.84949	8.79215e-19	5.98057e-18
AGAP008219	CYP6Z1	cytochrome P450	96.7906	2.44151	0.318382	7.6685	1.74023e-14	9.25207e-14
AGAP000889	AGAP000889	Coactosin-like protein	14892.7	2.43445	0.0818197	29.7539	1.54549e-194	4.69678e-192
AGAP013184	CLIPB36	CLIP-domain serine protease	1066.01	2.42672	0.273968	8.85767	8.17053e-19	5.57787e-18
AGAP009991	AGAP009991	Cyclophilin B precursor	8.15453	2.42471	0.642103	3.77621	0.000159235	0.000342893
AGAP005170	AGAP005170	nan	542.584	2.42262	0.178556	13.5679	6.20957e-42	1.1017e-40
AGAP010427	AGAP010427	serine palmitoyltransferase	1434.38	2.42177	0.140631	17.2207	1.85794e-66	6.70637e-65
AGAP027986	AGAP027986	nan	5.97019	2.42117	0.663101	3.65128	0.000260939	0.000545321
AGAP010763	AGAP010763	nan	171.598	2.41354	0.287441	8.39662	4.59499e-17	2.8555e-16
AGAP006455	AGAP006455	nan	16.775	2.40958	0.400094	6.02252	1.71718e-09	6.29967e-09
AGAP007033	APL1C	Anopheles Plasmodium-responsive Leucine-Rich Repeat 1C	11735.2	2.40731	0.261413	9.20884	3.29675e-20	2.4398e-19
AGAP010641	AGAP010641	nan	1925.66	2.40168	0.13809	17.3921	9.46799e-68	3.5396e-66
AGAP006891	AGAP006891	NADH dehydrogenase (ubiquinone) Fe-S protein 2	11.6081	2.39919	0.477959	5.01967	5.17612e-07	1.48853e-06
AGAP010295	AGAP010295	nan	87.2608	2.39644	0.352048	6.80715	9.95492e-12	4.3784e-11
AGAP013492	AGAP013492	glucose dehydrogenase (acceptor)	8.61541	2.39404	0.573054	4.17769	2.94486e-05	6.93415e-05
AGAP009194	GSTE2	glutathione S-transferase epsilon class 2	1135.34	2.38803	0.115531	20.6701	6.44178e-95	4.7045e-93	Granulocytes
AGAP010636	AGAP010636	nan	212.811	2.38788	0.221887	10.7617	5.22198e-27	5.31278e-26
AGAP004593	AGAP004593	EH domain-containing protein 1	5308.52	2.38736	0.13596	17.5593	5.04791e-69	1.95705e-67
AGAP002644	AGAP002644	phospholipid-translocating ATPase	1291	2.38702	0.156823	15.2211	2.56e-52	6.43139e-51
AGAP006826	AGAP006826	integrin alpha-ps	8461.45	2.38496	0.157677	15.1255	1.09892e-51	2.68906e-50
AGAP008313	AGAP008313	nan	146.622	2.38465	0.197837	12.0536	1.85692e-33	2.48848e-32
AGAP007286	Obp48	odorant-binding protein 48	95.0868	2.3766	0.271125	8.76569	1.85633e-18	1.2465e-17
AGAP011666	AGAP011666	nan	49.219	2.374	0.312429	7.59855	2.99465e-14	1.5613e-13
AGAP003878	AGAP003878	nan	37837.1	2.36715	0.0866037	27.3331	1.71471e-164	3.67142e-162	Oenocytes
AGAP002536	AGAP002536	nan	1726.08	2.3658	0.54885	4.31046	1.62913e-05	3.94754e-05
AGAP003796	AGAP003796	cyclin-dependent kinases regulatory subunit 1	77.1597	2.36382	0.229968	10.2789	8.77349e-25	7.95525e-24
AGAP002165	nan	nan	9.07212	2.35004	0.530425	4.43048	9.40219e-06	2.35392e-05
AGAP012429	NMDAR2	ionotropic receptor NMDAR2	24.0515	2.34867	0.379972	6.18116	6.3634e-10	2.43499e-09
AGAP001678	nan	nan	1197.1	2.34324	0.218769	10.7111	9.03242e-27	9.07719e-26
AGAP002877	AGAP002877	Tetratricopeptide repeat protein 30 homolog [Source:UniProtKB/Swiss-Prot;Acc:Q7PRA4]	18.0984	2.34086	0.361283	6.4793	9.21464e-11	3.77604e-10
AGAP008835	CLIPC1	CLIP-domain serine protease	35.0536	2.33882	0.339892	6.88106	5.94078e-12	2.65882e-11
AGAP006745	AGAP006745	nan	4198.8	2.33867	0.150433	15.5462	1.68721e-54	4.54148e-53	Megacytes
AGAP009098	AGAP009098	Protein-glutamine gamma-glutamyltransferase E	6078.07	2.33085	0.139368	16.7244	8.70113e-63	2.8662e-61	Megacytes
AGAP011064	AGAP011064	nan	326.475	2.30197	0.148222	15.5305	2.15606e-54	5.72175e-53
AGAP011530	AGAP011530	nan	28.3384	2.29681	0.326839	7.02734	2.1051e-12	9.7264e-12
AGAP010160	AGAP010160	myosin I	7761.46	2.29509	0.0873505	26.2745	3.75635e-152	6.43429e-150
AGAP010260	AGAP010260	nan	14.2421	2.29411	0.396612	5.78427	7.283e-09	2.50687e-08
AGAP005520	AGAP005520	cytochrome b-561	172.042	2.28121	0.203019	11.2364	2.70042e-29	3.0541e-28
AGAP010774	AGAP010774	nan	101.652	2.27663	0.294696	7.72538	1.11523e-14	6.03824e-14
AGAP007651	AGAP007651	growth arrest and DNA-damage-inducible protein	473.133	2.26488	0.227178	9.96964	2.06972e-23	1.76941e-22
AGAP002811	CLIPD4	CLIP-domain serine protease [Source:UniProtKB/TrEMBL;Acc:A0A1S4GG73]	16.5154	2.26326	0.377785	5.99086	2.0874e-09	7.61634e-09
AGAP001761	AGAP001761	ceramide synthetase	1899.92	2.25944	0.17287	13.0702	4.87365e-39	7.87559e-38
AGAP012802	AGAP012802	nan	117.208	2.25078	0.312326	7.20649	5.74135e-13	2.75544e-12
AGAP000812	AGAP000812	calcium binding protein	885.571	2.2468	0.098874	22.7239	2.60173e-114	2.88363e-112
AGAP010056	AGAP010056	hexosaminidase	1842.52	2.24649	0.236944	9.4811	2.51615e-21	1.98033e-20
AGAP009154	ARC-P34	actin-related protein 2/3 complex subunit 2	7240.76	2.24376	0.116223	19.3056	4.82178e-83	2.87506e-81
AGAP028157	AGAP028157	nan	4114.36	2.24176	0.143208	15.6539	3.12689e-55	8.56349e-54	Granulocytes, Dividing granulocytes and Megacytes
AGAP006270	AGAP006270	fyn-related kinase	1025.71	2.23481	0.154333	14.4805	1.61002e-47	3.48689e-46
AGAP007887	AGAP007887	nan	42.7709	2.23187	0.254237	8.77871	1.65355e-18	1.11431e-17
AGAP000204	AGAP000204	nan	23.8804	2.23013	0.459672	4.85158	1.22485e-06	3.38197e-06
AGAP004372	AGAP004372	elongation of very long chain fatty acids protein 1	1966.84	2.22777	0.125738	17.7175	3.07204e-70	1.26937e-68
AGAP004737	AGAP004737	Rhomboid-4, isoform B	1049.27	2.22163	0.12085	18.3834	1.78301e-75	8.39888e-74
AGAP003716	twf	Twinfilin [Source:UniProtKB/Swiss-Prot;Acc:Q7QG28]	167.788	2.21447	0.15442	14.3405	1.22142e-46	2.54579e-45
AGAP011790	CLIPA2	CLIP-domain serine protease	3495.72	2.21426	0.266506	8.30847	9.69428e-17	5.90749e-16
AGAP001424	AGAP001424	heat shock protein 90kDa beta	12691.8	2.2101	0.133107	16.604	6.52287e-62	2.09734e-60
AGAP008052	SAP2	sensory appendage protein 2	73.9829	2.20511	0.504938	4.36709	1.25912e-05	3.09475e-05
AGAP004853	AGAP004853	Ral GEF with PH domain and SH3-binding motif 1	3043.47	2.20245	0.0786064	28.0188	9.60251e-173	2.38066e-170
AGAP010862	nan	nan	1779.55	2.20088	0.258571	8.5117	1.71395e-17	1.09695e-16
AGAP028566	AGAP028566	nan	59.2965	2.19711	0.376134	5.84131	5.17917e-09	1.81184e-08
AGAP004163	GSTD7	glutathione S-transferase delta class 7	1846.75	2.19334	0.104345	21.02	4.30372e-98	3.35086e-96
AGAP008176	AGAP008176	dipeptidyl-peptidase 4	7.10616	2.19164	0.577323	3.7962	0.000146928	0.000317553
AGAP008016	AGAP008016	acyl-CoA oxidase	578.955	2.18356	0.163173	13.3819	7.71711e-41	1.33156e-39
AGAP007347	LYSC1	C-type lysozyme	5361.98	2.18161	0.242153	9.00923	2.07507e-19	1.46986e-18	AM granulocytes
AGAP011282	AGAP011282	Fatty acid 2-hydroxylase [Source:UniProtKB/TrEMBL;Acc:A0A1S4H682]	106.865	2.17619	0.227571	9.56269	1.1474e-21	9.16848e-21
AGAP001022	AGAP001022	nan	17.6604	2.16951	0.3553	6.10612	1.02083e-09	3.83462e-09
AGAP004717	AGAP004717	nan	13.7507	2.16623	0.481023	4.50337	6.68828e-06	1.70436e-05
AGAP010530	CLIPE4	CLIP-domain serine protease [Source:UniProtKB/TrEMBL;Acc:A0A1S4H4A2]	5775.54	2.16247	0.182785	11.8307	2.70985e-32	3.4734e-31
AGAP005749	GSTO1	glutathione S-transferase omega class 1	4862.24	2.16183	0.0631849	34.2143	1.48231e-256	1.16374e-253	Dividing granulocytes
AGAP028448	AGAP028448	nan	16.0491	2.16066	0.370408	5.83319	5.43792e-09	1.89954e-08
AGAP013358	AGAP013358	nan	7.40041	2.15769	0.54081	3.98973	6.61475e-05	0.000149946
AGAP008407	TEP13	thioester-containing protein 13	83.3654	2.15116	0.208906	10.2973	7.24813e-25	6.63602e-24
AGAP010057	AGAP010057	nicotinic acetylcholine receptor, beta-2 subunit	8.90938	2.14874	0.533606	4.02683	5.65332e-05	0.000128932
AGAP007876	AGAP007876	nan	35.4062	2.14201	0.26975	7.94071	2.01033e-15	1.13818e-14
AGAP013732	AGAP013732	nan	114.384	2.14197	0.248319	8.62588	6.36024e-18	4.15821e-17
AGAP010772	AGAP010772	nan	74.4284	2.13101	0.2519	8.45976	2.67938e-17	1.69185e-16
AGAP001175	GPRCAL2	putative calcitonin receptor 2	44.3774	2.13043	0.275808	7.72432	1.12453e-14	6.07814e-14
AGAP008599	AGAP008599	nan	22.0401	2.12977	0.346935	6.13881	8.31407e-10	3.15325e-09
AGAP009091	AGAP009091	aromatic-L-amino-acid decarboxylase	617.425	2.12427	0.355366	5.9777	2.26303e-09	8.21581e-09
AGAP010281	GPRGBB1	Putative GABA-B receptor 1 [Source:UniProtKB/TrEMBL;Acc:A0A1S4H3I9]	36.8367	2.12156	0.258337	8.21236	2.16889e-16	1.29734e-15
AGAP010457	AGAP010457	thymidylate synthase	944.989	2.12136	0.159233	13.3224	1.715e-40	2.9217e-39
AGAP009595	AGAP009595	sodium/potassium-transporting ATPase subunit beta	3805.38	2.11732	0.104449	20.2713	2.30419e-91	1.50748e-89
AGAP000562	AGAP000562	nan	9218.89	2.11669	0.162448	13.0299	8.2707e-39	1.3274e-37
AGAP008149	AGAP008149	Protein phosphatase 1B (formerly 2C) [Source:UniProtKB/TrEMBL;Acc:A0A1S4GXF4]	801.951	2.11596	0.160444	13.1882	1.02637e-39	1.69639e-38
AGAP028513	AGAP028513	nan	59.0244	2.11456	0.407679	5.18683	2.13901e-07	6.40549e-07
AGAP004164	GSTD1-4	glutathione S-transferase delta class 1	9459.92	2.11087	0.146147	14.4435	2.75513e-47	5.88574e-46	Granulocytes
AGAP001534	AGAP001534	nan	11.4041	2.11016	0.50881	4.14725	3.36488e-05	7.87201e-05
AGAP005814	AGAP005814	ecdysoneless homolog	734.855	2.09999	0.0800767	26.2248	1.38637e-151	2.33233e-149
AGAP004836	nan	nan	650.071	2.09815	0.175847	11.9317	8.09501e-33	1.05481e-31
AGAP005448	AGAP005448	B9 domain-containing protein 2	99.6055	2.09546	0.290573	7.2115	5.53397e-13	2.66405e-12
AGAP012056	AGAP012056	cofilin	21864.7	2.09271	0.0740594	28.2572	1.16046e-175	3.03687e-173	Granulocytes and Megacytes
AGAP012317	AGAP012317	nan	27.0264	2.09076	0.294743	7.09349	1.30773e-12	6.10513e-12
AGAP009528	AGAP009528	nan	517.774	2.08733	0.118754	17.577	3.69669e-69	1.44508e-67
AGAP009211	AGAP009211	nan	10.5378	2.08676	0.487911	4.27692	1.89493e-05	4.56554e-05
AGAP008245	AGAP008245	nan	44.1369	2.08421	0.251737	8.27933	1.23875e-16	7.49053e-16
AGAP002461	AGAP002461	nan	707.217	2.08371	0.147056	14.1695	1.41553e-45	2.8495e-44
AGAP013079	AGAP013079	nan	1464.4	2.08175	0.13322	15.6264	4.80992e-55	1.30589e-53
AGAP003838	AGAP003838	nan	8.74947	2.08069	0.533941	3.89684	9.74555e-05	0.000216132
AGAP003248	AGAP003248	nan	1059.75	2.0799	0.269283	7.72383	1.12889e-14	6.0982e-14
AGAP008551	AGAP008551	mothers against decapentaplegic homolog 1	487.154	2.06647	0.121255	17.0423	3.99046e-65	1.38724e-63
AGAP004397	AGAP004397	alpha-1,6-mannosyl-glycoprotein beta-1,2-N-acetylglucosaminyltransferase	573.81	2.06432	0.101457	20.3468	4.95411e-92	3.35775e-90
AGAP028537	AGAP028537	nan	11.1776	2.05494	0.454773	4.51862	6.2244e-06	1.59089e-05
AGAP010026	AGAP010026	phospholipid-translocating ATPase	1565.02	2.04886	0.19443	10.5378	5.78463e-26	5.58944e-25
AGAP009221	SRPN5	serine protease inhibitor (serpin) 5	2214.44	2.04735	0.17424	11.7502	7.04678e-32	8.83991e-31
AGAP003758	AGAP003758	nan	270.257	2.04189	0.194482	10.4991	8.71808e-26	8.34686e-25
AGAP003689	CLIPC7	CLIP-domain serine protease [Source:UniProtKB/TrEMBL;Acc:A0A1S4GIW4]	1211.44	2.04099	0.356864	5.71923	1.0701e-08	3.62771e-08
AGAP011938	AGAP011938	lamin	3921.04	2.03385	0.120428	16.8885	5.4714e-64	1.85417e-62
AGAP000748	AGAP000748	Muscular protein 20	9.56476	2.03373	0.465122	4.37245	1.22859e-05	3.02208e-05
AGAP004958	AGAP004958	ethanolaminephosphotransferase	294.496	2.03349	0.133762	15.2023	3.41646e-52	8.47013e-51
AGAP008670	AGAP008670	nan	1126.62	2.03151	0.150609	13.4886	1.82481e-41	3.19545e-40
AGAP011562	Oseg4	outer segment 4	87.8465	2.01666	0.214532	9.40029	5.44147e-21	4.18482e-20
AGAP012386	AGAP012386	nan	68937.7	2.00625	0.190819	10.5138	7.45858e-26	7.15553e-25
AGAP009828	AGAP009828	nan	15.0062	2.00435	0.575369	3.48358	0.000494748	0.000992552
AGAP001886	AGAP001886	nan	2720.98	2.00408	0.117051	17.1215	1.02662e-65	3.67025e-64
