# Supplementary material for: Hemocyte differentiation to the megacyte lineage enhances mosquito immunity against Plasmodium
Source: eLife. 2022 Sep 2;11:e81116. doi: 10.7554/eLife.81116 (PMC9545522; doi:10.7554/eLife.81116)
Supplement: Supplementary file 2. [file elife-81116-supp2.xlsx]

## Sheet: resMat_treatment_cactus_vs_lacz
Downregulated genes by Cactus Knockdown
Accesion Number	Name	Description	baseMean	log2FoldChange	lfcSE	stat	pvalue	padj	Hemocyte type
AGAP004978	PPO9	prophenoloxidase 9	23777.8	-7.93191	0.168537	-47.0634	0	0	Oenocytoids
AGAP028406	AGAP028406	nan	7750.25	-7.79928	0.225044	-34.6567	3.54357e-263	4.173e-260	Oenocytoids
AGAP002867	CYP6P4	cytochrome P450	25.5489	-7.71595	0.907148	-8.50573	1.80456e-17	1.15182e-16
AGAP000144	AGAP000144	progestin and adipoQ receptor family member 3	499.856	-7.69138	0.377367	-20.3817	2.43118e-92	1.68413e-90
AGAP006000	CPR25	cuticular protein RR-1 family 25	15.7864	-7.61046	0.918432	-8.28637	1.16761e-16	7.07401e-16
AGAP003581	AGAP003581	D-xylulose reductase A	1106.32	-7.12298	0.263556	-27.0265	7.22296e-161	1.47929e-158
AGAP007990	AGAP007990	glucosyl/glucuronosyl transferases	52.8643	-6.97594	1.25963	-5.5381	3.05766e-08	9.89565e-08
AGAP008880	AGAP008880	nan	35.9735	-6.73819	0.703666	-9.57584	1.01035e-21	8.08712e-21
AGAP006136	AGAP006136	monocyte to macrophage differentiation factor 2	330.164	-6.44261	0.360377	-17.8774	1.76868e-71	7.4387e-70
AGAP003571	AGAP003571	threonine dehydratase	1317.19	-6.37271	0.195754	-32.5546	1.80037e-232	9.97724e-230
AGAP000210	AGAP000210	triacylglycerol lipase	1077.17	-6.32483	0.227609	-27.7881	6.03421e-170	1.42121e-167
AGAP005752	AGAP005752	glucosyl/glucuronosyl transferases	2189.21	-6.21312	0.271805	-22.8588	1.19564e-115	1.40802e-113
AGAP006327	LRIM6	leucine-rich immune protein (Short)	682.281	-6.19719	0.365582	-16.9516	1.87318e-64	6.39394e-63
AGAP005751	AGAP005751	glucosyl/glucuronosyl transferases	42.4612	-6.19498	0.597101	-10.3751	3.21893e-25	3.01746e-24
AGAP006571	AGAP006571	nuclear receptor subfamily 1 group D member 3	9.68566	-6.14398	0.90942	-6.75594	1.41917e-11	6.16696e-11
AGAP002588	AGAP002588	nan	8419.61	-6.10843	0.182001	-33.5626	5.90007e-247	3.70564e-244
AGAP008387	AGAP008387	nan	150.385	-6.07226	0.629263	-9.6498	4.92527e-22	3.9932e-21
AGAP012251	AGAP012251	inorganic phosphate cotransporter	4805.26	-6.02657	0.237293	-25.3972	2.71037e-142	4.32787e-140
AGAP006137	nan	nan	22.8321	-5.97684	0.697005	-8.57503	9.90601e-18	6.40965e-17
AGAP009382	AGAP009382	nan	4.77125	-5.7854	1.05783	-5.4691	4.52336e-08	1.44456e-07
AGAP004449	AGAP004449	pancreatic triacylglycerol lipase	83.1502	-5.77574	0.57814	-9.9902	1.68237e-23	1.4435e-22
AGAP028980	SSU_rRNA_eukarya	Eukaryotic small subunit ribosomal RNA [Source:RFAM;Acc:RF01960]	655.932	-5.71218	0.97464	-5.86081	4.60615e-09	1.62041e-08
AGAP028554	AGAP028554	nan	1196.49	-5.64698	0.207862	-27.1669	1.59695e-162	3.34329e-160
AGAP002830	AGAP002830	C-1-tetrahydrofolate synthase, mitochondrial precursor	8450.49	-5.59759	0.235584	-23.7604	8.57053e-125	1.09112e-122
AGAP003636	AGAP003636	inositol oxygenase	2734.92	-5.5817	0.222221	-25.1178	3.17928e-139	4.91016e-137
AGAP008713	AGAP008713	nan	38.4404	-5.57504	0.516242	-10.7993	3.46939e-27	3.56435e-26
AGAP010363	AGAP010363	nan	14.702	-5.56689	0.821902	-6.77317	1.25987e-11	5.49756e-11
AGAP009385	AGAP009385	cellular retinaldehyde-binding protein	18.0446	-5.5656	0.695633	-8.00077	1.23646e-15	7.09424e-15
AGAP004572	AGAP004572	nan	26.4053	-5.54249	0.678367	-8.17034	3.0753e-16	1.82906e-15
AGAP003714	HPX3	heme peroxidase 3	3408.32	-5.47898	0.29712	-18.4403	6.24116e-76	2.9999e-74
AGAP012635	AGAP012635	nan	12.9651	-5.47297	0.768714	-7.11965	1.08199e-12	5.08909e-12
AGAP000352	TWDL1	cuticular protein TWDL family (TWDL1)	16.2536	-5.46647	0.714307	-7.65283	1.96607e-14	1.04175e-13
AGAP003999	AGAP003999	nan	163.646	-5.43986	0.315548	-17.2394	1.34382e-66	4.8693e-65
AGAP003066	CYP304B1	cytochrome P450	116.636	-5.43891	0.350242	-15.529	2.208e-54	5.84314e-53
AGAP012354	AGAP012354	Syntrophin, alpha 1	60.4766	-5.43146	0.540617	-10.0468	9.49269e-24	8.25767e-23
AGAP011098	AGAP011098	nan	137.616	-5.40416	0.361392	-14.9537	1.47261e-50	3.46837e-49	Oenocytoids
AGAP008714	AGAP008714	nan	60.8617	-5.37477	0.454718	-11.82	3.07677e-32	3.92767e-31
AGAP003582	AGAP003582	D-xylulose reductase A	17.4712	-5.29215	0.755417	-7.0056	2.45926e-12	1.13128e-11
AGAP010596	AGAP010596	Alkaline phosphatase [Source:UniProtKB/TrEMBL;Acc:Q7Q8R8]	4.84641	-5.2917	1.09684	-4.8245	1.40358e-06	3.84842e-06
AGAP000218	AGAP000218	nan	102.126	-5.28997	0.420484	-12.5807	2.69796e-36	3.95911e-35
AGAP003545	Osk	protein oskar	27.0433	-5.25327	0.762779	-6.88702	5.69752e-12	2.55358e-11
AGAP009219	AGAP009219	nan	23.1634	-5.2267	0.693891	-7.53245	4.97972e-14	2.55801e-13
AGAP006135	AGAP006135	nan	3.35152	-5.20314	1.0572	-4.92162	8.58324e-07	2.40878e-06
AGAP002317	Alpha_amylase	amylase	7282.68	-5.08388	0.268404	-18.9411	5.22851e-80	2.91466e-78	Oenocytoids
AGAP004563	ANCE9	angiotensin-converting enzyme 9	148.969	-5.06319	0.380159	-13.3186	1.8048e-40	3.06913e-39
AGAP012617	AGAP012617	nan	179.469	-5.0437	0.359257	-14.0392	8.96638e-45	1.75984e-43
AGAP005753	AGAP005753	glucosyl/glucuronosyl transferases	141.093	-5.02476	0.353779	-14.2031	8.76391e-46	1.77941e-44
AGAP007252	AGAP007252	Peptidase S1 domain-containing protein [Source:UniProtKB/TrEMBL;Acc:Q7QJ37]	46.2884	-5.02026	0.415677	-12.0773	1.3917e-33	1.87572e-32
AGAP028560	AGAP028560	nan	474.463	-5.00246	0.226879	-22.049	9.76767e-108	1.00023e-105
AGAP005585	AGAP005585	nan	301.522	-4.97928	0.209091	-23.8139	2.39562e-125	3.09167e-123
AGAP000844	AGAP000844	Progestin and adipoQ receptor family member 4	788.791	-4.90744	0.231815	-21.1697	1.81875e-99	1.43987e-97
AGAP011253	AGAP011253	nan	9.54329	-4.8934	0.816785	-5.99105	2.08486e-09	7.61001e-09
AGAP005497	AGAP005497	SCP domain-containing protein [Source:UniProtKB/TrEMBL;Acc:A0A1S4GPD3]	3.60834	-4.85664	1.11629	-4.35071	1.35698e-05	3.31968e-05
AGAP001477	AGAP001477	Innexin inx2	70.8758	-4.79537	0.344043	-13.9383	3.70678e-44	7.17075e-43
AGAP006609	AGAP006609	nan	21.0348	-4.78663	0.627698	-7.62569	2.4273e-14	1.27681e-13
AGAP002506	AGAP002506	runt-related transcription factor	324.201	-4.7582	0.199267	-23.8785	5.1199e-126	6.79361e-124
AGAP011230	AGAP011230	nan	543.437	-4.73481	0.259881	-18.2192	3.6357e-74	1.64673e-72
AGAP004450	AGAP004450	nan	134.456	-4.71306	0.312307	-15.0911	1.85261e-51	4.48673e-50
AGAP006001	CPR26	cuticular protein RR-1 family 26	127.927	-4.68161	0.344408	-13.5932	4.39401e-42	7.88495e-41
AGAP004980	PPO7	prophenoloxidase 7	13.6524	-4.67237	0.734185	-6.36402	1.96542e-10	7.86918e-10
AGAP003712	Ast1	allatostatin 1	7.08834	-4.66566	0.855866	-5.45139	4.99774e-08	1.58852e-07
AGAP012616	PPO5	prophenoloxidase 5	21687.5	-4.65155	0.23418	-19.8632	8.48134e-88	5.39883e-86	Oenocytoids
AGAP028480	AGAP028480	nan	3.47488	-4.6413	1.08646	-4.27195	1.93769e-05	4.66165e-05
AGAP007285	AGAP007285	alpha-L-fucosidase	311.379	-4.61583	0.281115	-16.4197	1.38179e-60	4.33928e-59
AGAP009924	AGAP009924	nan	9.66472	-4.60363	0.747561	-6.15819	7.35802e-10	2.80534e-09
AGAP004981	PPO4	prophenoloxidase 4	7206.3	-4.59921	0.14896	-30.8755	2.54491e-209	9.59024e-207	Oenocytoids
AGAP010975	AGAP010975	nan	26.7617	-4.5889	0.791611	-5.79692	6.75457e-09	2.33436e-08
AGAP010657	AGAP010657	nan	41.8936	-4.56666	0.455937	-10.016	1.29679e-23	1.1198e-22
AGAP007075	AGAP007075	nan	19.3365	-4.56445	0.610747	-7.47356	7.8054e-14	3.94077e-13
AGAP001112	AGAP001112	nan	3.13586	-4.54005	1.17558	-3.86197	0.000112478	0.000247006
AGAP028398	AGAP028398	nan	8.05143	-4.52808	0.846716	-5.34781	8.90251e-08	2.75618e-07
AGAP012644	AGAP012644	nan	5.27808	-4.50724	1.05765	-4.26156	2.03004e-05	4.86394e-05
AGAP004154	AGAP004154	jagged	857.96	-4.5032	0.206762	-21.7797	3.6169e-105	3.51287e-103
AGAP003767	AGAP003767	nan	5196.8	-4.49694	0.234817	-19.1508	9.52588e-82	5.53971e-80	Oenocytoids
AGAP029126	AGAP029126	nan	18.411	-4.44308	0.647014	-6.86706	6.55376e-12	2.92621e-11
AGAP004249	AGAP004249	nan	51.3954	-4.43759	0.38928	-11.3995	4.20638e-30	4.95974e-29
AGAP006385	AGAP006385	nan	283.54	-4.43075	0.777136	-5.70139	1.18834e-08	4.00549e-08
AGAP000605	AGAP000605	nan	261.957	-4.42456	0.88459	-5.00182	5.67923e-07	1.62577e-06
AGAP007918	AGAP007918	xanthine dehydrogenase/oxidase	4030.93	-4.42135	0.168811	-26.1911	3.35983e-151	5.55315e-149
AGAP011603	AGAP011603	Long-chain acyl-CoA synthetase [Source:UniProtKB/TrEMBL;Acc:A0A1S4H733]	8573.56	-4.42017	0.249691	-17.7026	4.00532e-70	1.64778e-68
AGAP004510	AGAP004510	Innexin inx2	459.008	-4.41813	0.267159	-16.5375	1.97167e-61	6.29665e-60
AGAP028913	LSU_rRNA_eukarya	Eukaryotic large subunit ribosomal RNA [Source:RFAM;Acc:RF02543]	99.0881	-4.40896	0.993143	-4.4394	9.02088e-06	2.26327e-05
AGAP008141	AGAP008141	argininosuccinate lyase	6002.19	-4.39652	0.175102	-25.1083	4.03181e-139	6.1264e-137
AGAP007588	AGAP007588	glucosyl/glucuronosyl transferases	394.076	-4.38681	0.180855	-24.2559	5.72729e-130	8.05326e-128
AGAP000211	AGAP000211	triacylglycerol lipase	5103.26	-4.38491	0.158075	-27.7394	2.34001e-169	5.37688e-167
AGAP028555	AGAP028555	nan	498.282	-4.3592	0.257152	-16.9519	1.86432e-64	6.38683e-63
AGAP003176	AGAP003176	solute carrier family 23 (nucleobase transporter)	76.3544	-4.35023	0.333782	-13.0331	7.92785e-39	1.27454e-37
AGAP013159	nan	nan	19.4742	-4.32782	0.51109	-8.46784	2.49991e-17	1.58065e-16
AGAP007455	LRIM10	leucine-rich immune protein (Short)	3911.5	-4.32759	0.248414	-17.4209	5.72668e-68	2.16671e-66
AGAP000153	AGAP000153	nan	40.8879	-4.31564	0.485064	-8.89707	5.73422e-19	3.95766e-18
AGAP004977	PPO6	prophenoloxidase 6	79084	-4.31282	0.180599	-23.8807	4.86648e-126	6.54959e-124	Oenocytoids
AGAP009198	AGAP009198	nan	128.734	-4.28938	0.304646	-14.0799	5.04817e-45	9.99135e-44
AGAP013267	AGAP013267	nan	170.045	-4.2878	0.313853	-13.6618	1.7167e-42	3.12824e-41
AGAP000356	AGAP000356	nan	8.52123	-4.25259	0.744555	-5.71158	1.11932e-08	3.78095e-08
AGAP002518	AGAP002518	delta-1-pyrroline-5-carboxylate synthetase	37793.2	-4.20722	0.150723	-27.9137	1.82175e-171	4.40069e-169	Granulocytes
AGAP012960	AGAP012960	nan	257.302	-4.20622	0.215096	-19.5551	3.73425e-85	2.32983e-83
AGAP009039	AGAP009039	glucose-6-phosphate 1-epimerase	151.953	-4.20539	0.32753	-12.8397	9.8257e-38	1.52752e-36
AGAP009516	nan	nan	8.12601	-4.20444	0.863709	-4.86789	1.12799e-06	3.1246e-06
AGAP003087	AGAP003087	nan	5.12562	-4.20253	0.968186	-4.34063	1.42077e-05	3.47212e-05
AGAP001251	AGAP001251	eupolytin	11.7229	-4.1849	0.621874	-6.72951	1.70238e-11	7.34345e-11
AGAP010004	AGAP010004	nan	5.07615	-4.18275	0.904138	-4.62623	3.72375e-06	9.78562e-06
AGAP010725	nan	nan	174.004	-4.17878	0.263844	-15.838	1.70021e-56	4.88343e-55
AGAP003086	AGAP003086	nan	7.02442	-4.16004	0.868516	-4.78982	1.6693e-06	4.54259e-06
AGAP006570	AGAP006570	myo-inositol-1(or 4)-monophosphatase	8859.5	-4.1574	0.178881	-23.2411	1.74852e-119	2.13933e-117	Oenocytoids
AGAP006134	AGAP006134	nan	6.65423	-4.14692	0.937298	-4.42434	9.6739e-06	2.41499e-05
AGAP002587	AGAP002587	nan	19.6542	-4.14465	0.640709	-6.46885	9.87523e-11	4.04147e-10
AGAP005972	AGAP005972	4-nitrophenylphosphatase	318.702	-4.13972	0.287054	-14.4214	3.7963e-47	8.01904e-46
AGAP001880	AGAP001880	bZIP factor, other	16.0848	-4.13095	0.709654	-5.82108	5.84686e-09	2.03409e-08
AGAP000679	AGAP000679	Aminoacylase [Source:UniProtKB/TrEMBL;Acc:Q7QEF5]	31526.1	-4.10472	0.153254	-26.7838	4.99667e-158	9.41472e-156	Oenocytoids
AGAP001010	AGAP001010	chondroitin sulfate synthase	170.094	-4.10316	0.240243	-17.0792	2.11983e-65	7.50785e-64
AGAP013241	CYP4D16	cytochrome P450	5.30215	-4.09059	0.83424	-4.90337	9.42055e-07	2.63122e-06
AGAP003321	AGAP003321	glycine dehydrogenase	1498.67	-4.08763	0.194778	-20.9861	8.7899e-98	6.78768e-96
AGAP006258	PPO2	prophenoloxidase 2	28442.1	-4.05108	0.231826	-17.4746	2.23633e-68	8.5644e-67	Oenocytoids
AGAP009899	AGAP009899	nan	8.83591	-4.03893	0.720095	-5.60889	2.03628e-08	6.72407e-08
AGAP002721	AGAP002721	Tryptophan 2,3-dioxygenase [Source:UniProtKB/Swiss-Prot;Acc:O77457]	2065.79	-4.025	0.222509	-18.0892	3.87998e-73	1.73238e-71
AGAP010799	AGAP010799	nan	5.39154	-4.01044	0.987964	-4.0593	4.92201e-05	0.000113098
AGAP008359	AGAP008359	sodium-coupled monocarboxylate transporter 1	3.85256	-4.01025	1.06864	-3.75266	0.000174967	0.000374628
AGAP011228	AGAP011228	nan	8413.98	-4.0098	0.466809	-8.58982	8.71082e-18	5.66745e-17	Granulocytes
AGAP006906	AGAP006906	Cat eye syndrome critical region protein 1	1347.74	-4.00093	0.112698	-35.5014	4.67255e-276	6.28859e-273
AGAP006726	COEAE5G	carboxylesterase	2201.17	-3.9975	0.194333	-20.5704	5.05574e-94	3.63588e-92	Oenocytoids
AGAP007076	AGAP007076	nan	67.4688	-3.98754	0.286252	-13.9302	4.15336e-44	8.01819e-43
AGAP009874	CPR76	cuticular protein RR-1 family 76	5.80861	-3.97095	0.989733	-4.01214	6.01712e-05	0.000136926
AGAP005750	AGAP005750	glucosyl/glucuronosyl transferases	1511.88	-3.96393	0.173921	-22.7916	5.56022e-115	6.38815e-113
AGAP009940	AGAP009940	nan	284.248	-3.96172	0.268875	-14.7345	3.8722e-49	8.68572e-48
AGAP006206	nan	nan	190.511	-3.94086	0.223272	-17.6505	1.00808e-69	4.04134e-68
AGAP007456	LRIM8B	leucine-rich immune protein (Short)	6118.41	-3.93044	0.227269	-17.2943	5.19666e-67	1.89026e-65	Granulocytes
AGAP013029	AGAP013029	nan	140.185	-3.92935	0.30944	-12.6983	6.04565e-37	9.11298e-36
AGAP001252	AGAP001252	eupolytin	11.9178	-3.92848	0.557648	-7.04473	1.85817e-12	8.61505e-12
AGAP001962	GPRVPR1	GPCR vasopressin family receptor 1	171.219	-3.90794	0.172317	-22.6788	7.25636e-114	7.94908e-112
AGAP006549	AGAP006549	nan	19.9821	-3.89142	0.502802	-7.73947	9.98344e-15	5.44294e-14
AGAP011617	AGAP011617	nan	4.90321	-3.88664	0.913614	-4.25414	2.09856e-05	5.01791e-05
AGAP006168	AGAP006168	BMP binding endothelial regulator	694.7	-3.87735	0.209466	-18.5107	1.69422e-76	8.40065e-75
AGAP003067	CYP304C1	cytochrome P450	233.072	-3.87572	0.2526	-15.3433	3.92708e-53	1.00535e-51
AGAP009283	AGAP009283	nan	6.56034	-3.81832	0.953741	-4.00352	6.24064e-05	0.00014167
AGAP028468	AGAP028468	nan	707.936	-3.8171	0.216466	-17.6337	1.35679e-69	5.37072e-68
AGAP003289	AGAP003289	carbonic anhydrase	6.26896	-3.81387	0.995588	-3.83077	0.000127742	0.000278191
AGAP013755	AGAP013755	nan	7789.43	-3.80458	0.245972	-15.4675	5.74805e-54	1.51264e-52
AGAP000466	ACE2	acetylcholinesterase	130.015	-3.80194	0.283838	-13.3948	6.48728e-41	1.12554e-39
AGAP007674	AGAP007674	GIPC PDZ domain containing family, member 2	411.416	-3.79906	0.216559	-17.5428	6.74851e-69	2.60564e-67
AGAP007454	LRIM8A	leucine-rich immune protein (Short)	9438.76	-3.7942	0.235733	-16.0953	2.75087e-58	8.33309e-57
AGAP010604	ILP6	Insulin-like peptide 6	8.52382	-3.79295	0.86731	-4.37323	1.22421e-05	3.01288e-05
AGAP001415	AGAP001415	nan	3.2747	-3.79041	1.07786	-3.5166	0.000437106	0.000883306
AGAP009521	AGAP009521	nan	97.5543	-3.78995	0.333402	-11.3675	6.06949e-30	7.08559e-29
AGAP011972	AGAP011972	Epoxide hydrolase	198.134	-3.7888	0.176384	-21.4804	2.37338e-102	2.08968e-100
AGAP000275	AGAP000275	epidermal retinal dehydrogenase	612.865	-3.77411	0.177084	-21.3125	8.68803e-101	7.4409e-99
AGAP001476	AGAP001476	Innexin inx2	1293.11	-3.77385	0.237503	-15.8897	7.46388e-57	2.17029e-55
AGAP001281	AGAP001281	potassium inwardly-rectifying channel subfamily J	3123.48	-3.7599	0.166225	-22.6194	2.79415e-113	3.02571e-111
AGAP000162	AGAP000162	Cystathionine beta-synthase [Source:UniProtKB/TrEMBL;Acc:Q7QEV0]	12899.2	-3.75541	0.219341	-17.1214	1.0285e-65	3.67025e-64	Oenocytoids
AGAP013329	AGAP013329	nan	58.5082	-3.74906	0.387625	-9.67186	3.97079e-22	3.2249e-21
AGAP013758	AGAP013758	xanthine dehydrogenase	292.999	-3.74784	0.20912	-17.9219	7.94971e-72	3.40428e-70
AGAP006226	Aldehyde_oxidase	nan	176.001	-3.74654	0.262123	-14.2931	2.4176e-46	4.98384e-45
AGAP002593	AGAP002593	outer membrane lipoprotein Blc	2444.71	-3.7322	0.257695	-14.483	1.55164e-47	3.3682e-46
AGAP004367	AGAP004367	nan	6.27642	-3.71151	0.713101	-5.20475	1.94256e-07	5.8376e-07
AGAP013028	AGAP013028	nan	1117.68	-3.71002	0.247694	-14.9782	1.01911e-50	2.41232e-49
AGAP028641	AGAP028641	nan	56.8742	-3.70306	0.293124	-12.6331	1.38711e-36	2.05795e-35
AGAP007453	LRIM9	leucine-rich immune protein (Short)	4537.2	-3.69394	0.277207	-13.3255	1.64439e-40	2.80649e-39	Granulocytes
AGAP003205	AGAP003205	nan	376.619	-3.68921	0.259565	-14.2131	7.60358e-46	1.55387e-44
AGAP005717	LYSC6	C-type lysozyme (multi-lysozyme domain protein)	22.5284	-3.68676	0.43942	-8.39007	4.85853e-17	3.00935e-16
AGAP003730	AGAP003730	neutral ceramidase	896.205	-3.68553	0.225181	-16.367	3.29211e-60	1.02023e-58
AGAP007764	AGAP007764	nan	8.99746	-3.67369	0.650031	-5.65157	1.58993e-08	5.29658e-08
AGAP004940	AGAP004940	nan	382.504	-3.67212	0.249836	-14.6981	6.62693e-49	1.47246e-47
AGAP008193	AGAP008193	Nidogen (entactin) [Source:UniProtKB/TrEMBL;Acc:A0A1S4GXK2]	462.638	-3.67137	0.214636	-17.1051	1.35951e-65	4.8332e-64
AGAP013403	AGAP013403	sodium-coupled monocarboxylate transporter 2	17.9127	-3.66784	0.594774	-6.16679	6.9691e-10	2.65921e-09
AGAP006227	AGAP006227	alpha esterase	125.044	-3.66392	0.266344	-13.7563	4.66562e-43	8.72119e-42
AGAP011373	AGAP011373	nan	3.74438	-3.65934	0.946699	-3.86537	0.000110923	0.000243818
AGAP005645	AGAP005645	dehydrogenase/reductase SDR family member 11 precursor	302.389	-3.65284	0.420666	-8.68347	3.83873e-18	2.54144e-17
AGAP011507	AGAP011507	nan	904.648	-3.6467	0.231459	-15.7553	6.31545e-56	1.77077e-54
AGAP006376	PDP1	PAR-domain protein 1	433.91	-3.6451	0.395274	-9.2217	2.92424e-20	2.17266e-19
AGAP011349	AGAP011349	GABA-gated chloride channel	4.25919	-3.63455	0.890924	-4.07953	4.51267e-05	0.000104098
AGAP013039	AGAP013039	nan	14.0975	-3.61423	0.577891	-6.25417	3.9963e-10	1.56313e-09
AGAP003000	AGAP003000	MFS transporter, PCFT/HCP family, solute carrier family 46 (folate transporter	2287.38	-3.61325	0.178192	-20.2772	2.04251e-91	1.35511e-89
AGAP000351	GPRNPY1	neuropeptide Y receptor 1	643.541	-3.60203	0.197422	-18.2453	2.254e-74	1.02584e-72
AGAP006183	AGAP006183	slit protein	37.8091	-3.59016	0.403372	-8.90035	5.56703e-19	3.84791e-18
AGAP000728	AGAP000728	wengen	326.557	-3.58199	0.245538	-14.5884	3.33079e-48	7.36605e-47
AGAP002890	AGAP002890	Lipid storage droplets surface-binding protein 1	5661.55	-3.57975	0.217397	-16.4664	6.39551e-61	2.02188e-59	Granulocytes
AGAP012957	CYP4D17	cytochrome P450	153.399	-3.5718	0.277735	-12.8605	7.5119e-38	1.17168e-36
AGAP009498	AGAP009498	solute carrier family 17 (anion/sugar transporter), member 5	4273.28	-3.57017	0.18634	-19.1594	8.07499e-82	4.72513e-80
AGAP012761	AGAP012761	Synaptic vesicle protein	182.275	-3.56445	0.193116	-18.4575	4.5353e-76	2.20243e-74
AGAP007599	AGAP007599	monolysocardiolipin acyltransferase	3128.34	-3.55644	0.16455	-21.6132	1.35029e-103	1.24716e-101
AGAP010794	AGAP010794	nan	304.73	-3.53903	0.249632	-14.177	1.27206e-45	2.56619e-44
AGAP010726	nan	nan	35.5277	-3.53253	0.361734	-9.76555	1.58251e-22	1.30436e-21
AGAP005459	CPR16	cuticular protein RR-1 family 16	438.76	-3.52662	0.220765	-15.9746	1.92174e-57	5.6933e-56
AGAP003713	AGAP003713	nan	63.627	-3.52586	0.38974	-9.04669	1.47364e-19	1.05255e-18
AGAP012570	AGAP012570	nan	53.1129	-3.50255	0.41202	-8.50094	1.88068e-17	1.19958e-16
AGAP001791	AGAP001791	nan	331.958	-3.50229	0.309727	-11.3077	1.20247e-29	1.37816e-28
AGAP005866	AGAP005866	glutamate decarboxylase	15.169	-3.49578	0.508191	-6.87887	6.03302e-12	2.69882e-11
AGAP001601	AGAP001601	Ser/Thr protein phosphatase/nucleotidase	774.104	-3.46824	0.165752	-20.9243	3.21599e-97	2.42382e-95
AGAP013226	AGAP013226	nan	1644.12	-3.45714	0.129695	-26.6559	1.52696e-156	2.76644e-154
AGAP012395	AGAP012395	peptide-methionine (S)-S-oxide reductase	3850.15	-3.44998	0.261352	-13.2005	8.71672e-40	1.44578e-38
AGAP002629	AGAP002629	nan	1275.01	-3.44926	0.812565	-4.24491	2.18681e-05	5.22096e-05
AGAP005563	Tret1	facilitated trehalose transporter Tret1	40580	-3.44111	0.204018	-16.8667	7.90767e-64	2.66065e-62	Granulocytes
AGAP008558	AGAP008558	nan	4.46517	-3.43698	0.831768	-4.13214	3.59406e-05	8.37074e-05
AGAP000604	AGAP000604	nan	4.84914	-3.43337	0.90454	-3.79571	0.000147222	0.000317969
AGAP001015	AGAP001015	notch gene homolog 1	3328.58	-3.43115	0.225793	-15.1959	3.76173e-52	9.30165e-51
AGAP007755	AGAP007755	nan	6.01877	-3.42887	0.802763	-4.27134	1.94304e-05	4.67331e-05
AGAP006729	AGAP006729	Ester hydrolase C11orf54	5111.63	-3.41308	0.126768	-26.9238	1.15762e-159	2.3204e-157
AGAP002625	CTL9	C-type lectin (CTL)	53.9991	-3.41011	0.286201	-11.9151	9.87787e-33	1.28181e-31
AGAP003501	AGAP003501	Lipase [Source:UniProtKB/TrEMBL;Acc:Q5TVS6]	3.37367	-3.39827	0.926607	-3.66744	0.000244995	0.000513823
AGAP010162	AGAP010162	nan	4.98427	-3.383	0.817761	-4.13691	3.52016e-05	8.21282e-05
AGAP004156	AGAP004156	synaptic vesicle protein	160.255	-3.38037	0.189938	-17.7972	7.42866e-71	3.11046e-69
AGAP003209	AGAP003209	C-4 methylsterol oxidase	81.4207	-3.37666	0.265371	-12.7243	4.33271e-37	6.57303e-36
AGAP003106	Nep4	neprilysin, neutral endopeptidase 4	217.722	-3.37422	0.206959	-16.3038	9.2798e-60	2.85703e-58
AGAP001106	AGAP001106	Disconnected protein	138.712	-3.37269	0.335577	-10.0504	9.14746e-24	7.98686e-23
AGAP006396	AGAP006396	phospholipase B, plb1	9.53579	-3.36851	0.736278	-4.57505	4.76107e-06	1.23551e-05
AGAP009751	ANCE2	angiotensin-converting enzyme 2	1390.43	-3.36425	0.174668	-19.2608	1.14528e-82	6.74354e-81
AGAP004203	Vg	vitellogenin	80.8811	-3.35272	0.28046	-11.9544	6.1595e-33	8.04836e-32
AGAP012851	AGAP012851	Aldo-keto reductase family 1, member C3	2689.5	-3.35093	0.189856	-17.6498	1.02133e-69	4.0771e-68	Oenocytoids
AGAP002091	AGAP002091	phosphoribosylformylglycinamidine synthase	5133.69	-3.33927	0.277921	-12.0152	2.95805e-33	3.91402e-32
AGAP011460	AGAP011460	salivary cysteine-rich protein	213.407	-3.33909	0.245072	-13.6249	2.84728e-42	5.17842e-41
AGAP012351	nan	nan	408.859	-3.33858	0.222194	-15.0255	4.99819e-51	1.18909e-49
AGAP012341	AGAP012341	nan	12.3281	-3.33765	0.539539	-6.18611	6.16677e-10	2.36263e-09
AGAP009551	AGAP009551	sulfotransferase (Sult)	13.6903	-3.33239	0.548178	-6.07904	1.20905e-09	4.51642e-09
AGAP011223	AGAP011223	nan	5276.54	-3.32694	0.160391	-20.7427	1.42583e-95	1.04943e-93
AGAP002868	CYP6P1	cytochrome P450	143.41	-3.32355	0.219926	-15.1121	1.34727e-51	3.28824e-50
AGAP004936	AGAP004936	nan	58521.5	-3.31993	0.168958	-19.6495	5.84364e-86	3.69483e-84	Prohemocytes
AGAP007028	AGAP007028	glucosyl/glucuronosyl transferases	366.713	-3.31728	0.160692	-20.6437	1.11306e-94	8.06629e-93
AGAP011106	AGAP011106	nan	136.41	-3.30392	0.327166	-10.0986	5.60304e-24	4.94717e-23
AGAP002347	AGAP002347	N-acetylglucosamine-6-phosphate deacetylase [Source:UniProtKB/TrEMBL;Acc:Q7QBX3]	2255.66	-3.30183	0.207539	-15.9094	5.44952e-57	1.59441e-55
AGAP007598	AGAP007598	nan	25.3472	-3.27527	0.445471	-7.35238	1.94707e-13	9.61391e-13
AGAP028204	AGAP028204	Alpha-mannosidase [Source:UniProtKB/TrEMBL;Acc:A0A1S4HD42]	17.4901	-3.26926	0.560781	-5.82983	5.54826e-09	1.93522e-08
AGAP003580	AGAP003580	nan	14020	-3.26038	0.185457	-17.5803	3.48911e-69	1.36962e-67
AGAP001124	AGAP001124	Aminomethyltransferase [Source:UniProtKB/TrEMBL;Acc:Q7PWZ1]	357.537	-3.24451	0.284505	-11.404	3.99122e-30	4.71193e-29
AGAP003542	AGAP003542	Epoxide hydrolase 2, cytoplasmic	310.598	-3.23491	0.242366	-13.3472	1.22987e-40	2.10283e-39
AGAP028901	SSU_rRNA_eukarya	Eukaryotic small subunit ribosomal RNA [Source:RFAM;Acc:RF01960]	15.2663	-3.22583	0.711961	-4.53091	5.87297e-06	1.50843e-05
AGAP005869	AGAP005869	nan	38.8862	-3.22116	0.405392	-7.94579	1.9295e-15	1.09439e-14
AGAP004107	AGAP004107	nan	5.57586	-3.21892	0.752635	-4.27687	1.89541e-05	4.56554e-05
AGAP006224	AGAP006224	aldehyde oxidase	290.449	-3.21717	0.207065	-15.537	1.94911e-54	5.21663e-53
AGAP004731	AGAP004731	secretory phospholipase A2	1220.1	-3.21654	0.2474	-13.0014	1.20116e-38	1.91799e-37
AGAP028056	AGAP028056	nan	73.6524	-3.20018	0.235509	-13.5884	4.69321e-42	8.3899e-41
AGAP001856	PER	period circadian protein	1765.52	-3.1845	0.169794	-18.7551	1.76032e-78	9.26479e-77
AGAP028649	AGAP028649	nan	161.096	-3.17835	0.201673	-15.7599	5.86927e-56	1.65058e-54
AGAP012394	AGAP012394	peptide-methionine (S)-S-oxide reductase	4493.91	-3.17224	0.249562	-12.7112	5.12128e-37	7.7444e-36	Granulocytes
AGAP004160	AGAP004160	nan	172.689	-3.1631	0.334383	-9.4595	3.09405e-21	2.417e-20
AGAP004531	AGAP004531	cathepsin B precursor	6.10947	-3.15894	0.738618	-4.27682	1.8958e-05	4.56554e-05
AGAP011051	AGAP011051	aldehyde reductase	295.973	-3.15833	0.24149	-13.0785	4.37039e-39	7.08665e-38
AGAP000033	AGAP000033	Protein retinal degeneration B	370.802	-3.1552	0.201672	-15.6452	3.58205e-55	9.78158e-54
AGAP008304	AGAP008304	3',5'-cyclic-nucleotide phosphodiesterase	1039.83	-3.15348	0.211866	-14.8843	4.16668e-50	9.57421e-49
AGAP007633	AGAP007633	solute carrier family 36 (proton-coupled amino acid transporter)	14609.7	-3.14566	0.15715	-20.0169	3.92245e-89	2.54851e-87
AGAP012280	AGAP012280	nan	266.113	-3.1455	0.191952	-16.387	2.37033e-60	7.41891e-59
AGAP001554	AGAP001554	nan	202.09	-3.12666	0.199211	-15.6952	1.63043e-55	4.53105e-54
AGAP028956	SSU_rRNA_eukarya	Eukaryotic small subunit ribosomal RNA [Source:RFAM;Acc:RF01960]	1718.11	-3.12593	0.794113	-3.93638	8.27201e-05	0.000185284
AGAP005009	AGAP005009	Pyrroline-5-carboxylate reductase [Source:UniProtKB/TrEMBL;Acc:Q7PPH9]	2617.05	-3.12326	0.208873	-14.9529	1.49041e-50	3.50154e-49
AGAP011476	AGAP011476	nan	20.2689	-3.11627	0.489038	-6.37226	1.86267e-10	7.47049e-10
AGAP002720	AGAP002720	cathepsin O	881.741	-3.10651	0.200176	-15.5188	2.58646e-54	6.82551e-53
AGAP010885	AGAP010885	nan	421.509	-3.10529	0.284507	-10.9146	9.8121e-28	1.02825e-26
AGAP003587	AGAP003587	sodium-independent sulfate anion transporter	1718.76	-3.09715	0.163865	-18.9007	1.12606e-79	6.16781e-78
AGAP011462	AGAP011462	nan	4.86236	-3.09617	0.742073	-4.17233	3.015e-05	7.09398e-05
AGAP006725	COEAE3H	carboxylesterase alpha esterase	407.088	-3.09166	0.224377	-13.7788	3.41677e-43	6.43788e-42
AGAP004095	AGAP004095	nan	174.526	-3.07584	0.223918	-13.7364	6.14185e-43	1.14127e-41
AGAP001635	AGAP001635	sodium-coupled monocarboxylate transporter 2	204.457	-3.07552	0.182687	-16.8349	1.35364e-63	4.53832e-62
AGAP005223	AGAP005223	Lipocln_cytosolic_FA-bd_dom domain-containing protein [Source:UniProtKB/TrEMBL;Acc:Q7Q9I2]	165.007	-3.06598	0.231531	-13.2422	5.00596e-40	8.39167e-39
AGAP007589	AGAP007589	glucosyl/glucuronosyl transferases	621.721	-3.05787	0.170626	-17.9214	8.02864e-72	3.42253e-70
AGAP003500	AGAP003500	Lipase [Source:UniProtKB/TrEMBL;Acc:Q7QH37]	9.20283	-3.0517	0.538751	-5.66441	1.47533e-08	4.92876e-08
AGAP005456	CPR15	cuticular protein RR-1 family 15	34.5988	-3.03562	0.320985	-9.4572	3.16299e-21	2.46677e-20
AGAP000313	AGAP000313	alanine-glyoxylate aminotransferase 2-like	4145.07	-3.03488	0.181685	-16.7041	1.22334e-62	4.00178e-61
AGAP013365	AGAP013365	nan	6527.83	-3.03182	0.159382	-19.0224	1.11373e-80	6.32073e-79	Granulocytes
AGAP013453	AGAP013453	nan	12.7576	-3.02905	0.530948	-5.70498	1.16354e-08	3.92613e-08
AGAP008289	AGAP008289	nan	10.3312	-3.02465	0.615527	-4.91392	8.92716e-07	2.49934e-06
AGAP010633	nan	nan	1204.37	-3.02252	0.219717	-13.7564	4.65989e-43	8.72119e-42
AGAP008225	AGAP008225	trehalose 6-phosphate phosphatase	5167.64	-3.02121	0.213844	-14.1281	2.54971e-45	5.11082e-44
AGAP013231	AGAP013231	Nitrilase homolog 2	559.87	-3.01828	0.232271	-12.9946	1.31212e-38	2.08809e-37
AGAP011104	AGAP011104	nan	427.715	-3.01469	0.291391	-10.3459	4.36944e-25	4.06764e-24
AGAP008214	CYP6M4	cytochrome P450	15.9113	-3.01363	0.561155	-5.3704	7.85622e-08	2.44349e-07
AGAP001597	AGAP001597	nan	4.84873	-3.01054	0.77095	-3.90497	9.42364e-05	0.000209535
AGAP008013	AGAP008013	nan	7263.01	-3.01001	0.261741	-11.5	1.31937e-30	1.58543e-29
AGAP003490	AGAP003490	alanine-glyoxylate aminotransferase	795.276	-3.00714	0.13989	-21.4964	1.68129e-102	1.49429e-100	Oenocytoids
AGAP001410	AGAP001410	nan	15.4557	-2.9986	0.425174	-7.05264	1.75558e-12	8.14747e-12
AGAP000690	AGAP000690	nan	279.406	-2.98455	0.242012	-12.3322	6.07351e-35	8.5785e-34
AGAP012350	nan	nan	1796.17	-2.98344	0.165157	-18.0642	6.09658e-73	2.70924e-71
AGAP009029	AGAP009029	Protein real-time [Source:UniProtKB/TrEMBL;Acc:A0A1S4GZW6]	79.8068	-2.98198	0.278979	-10.6889	1.14734e-26	1.14746e-25
AGAP008712	AGAP008712	Solute carrier organic anion transporter family member [Source:UniProtKB/TrEMBL;Acc:A0A1S4GZ11]	112.56	-2.9781	0.288771	-10.313	6.15574e-25	5.6634e-24
AGAP011648	AGAP011648	nan	11.7237	-2.97673	0.586178	-5.07821	3.81005e-07	1.11163e-06
AGAP010968	CLIPA9	CLIP-domain serine protease	10945	-2.97126	0.247353	-12.0122	3.06453e-33	4.04922e-32	Dividing Granulocytes
AGAP012352	AGAP012352	Niemann-Pick C2 protein	5006.95	-2.97028	0.212966	-13.9472	3.27275e-44	6.34416e-43	Dividing Granulocytes
AGAP005175	AGAP005175	acetyl-CoA carboxylase / biotin carboxylase	23704.2	-2.95984	0.215831	-13.7137	8.40361e-43	1.54932e-41
AGAP028439	AGAP028439	nan	5257	-2.95365	0.184814	-15.9817	1.71359e-57	5.09267e-56	Granulocytes
AGAP001600	AGAP001600	Ser/Thr protein phosphatase/nucleotidase	104.14	-2.95263	0.259692	-11.3697	5.91826e-30	6.9262e-29
AGAP012953	AGAP012953	epidermal retinal dehydrogenase	1187.39	-2.94249	0.198152	-14.8497	6.99271e-50	1.59899e-48
AGAP013431	nan	nan	136.457	-2.94069	0.233723	-12.5819	2.65475e-36	3.90178e-35
AGAP002323	AGAP002323	nan	554.594	-2.92597	0.158678	-18.4397	6.30938e-76	3.01729e-74
AGAP003962	AGAP003962	WSCD family member AGAP003962	21.0022	-2.9174	0.365456	-7.98292	1.42915e-15	8.17985e-15
AGAP009922	AGAP009922	salivary purine nucleosidase	430.348	-2.91568	0.148868	-19.5856	2.05101e-85	1.28817e-83
AGAP003993	AGAP003993	nan	6.76002	-2.9112	0.797854	-3.64879	0.00026348	0.00055002
AGAP006369	CPR144	cuticular protein RR-2 family 144	19.9079	-2.90999	0.509162	-5.71525	1.09544e-08	3.70561e-08
AGAP003453	AGAP003453	nan	5931.74	-2.90997	0.16819	-17.3016	4.57113e-67	1.66917e-65
AGAP009128	AGAP009128	mitochondrial carnitine/acylcarnitine carrier protein	2204.91	-2.90948	0.184302	-15.7865	3.85496e-56	1.10053e-54
AGAP008596	AGAP008596	long-chain-fatty-acid--CoA ligase ACSBG	10721.8	-2.90322	0.240967	-12.0482	1.98212e-33	2.64124e-32
AGAP005674	AGAP005674	nan	2631.86	-2.88848	0.202584	-14.2582	3.98509e-46	8.19729e-45
AGAP003015	AGAP003015	Argininosuccinate synthase [Source:UniProtKB/Swiss-Prot;Acc:Q7PR38]	905.993	-2.88397	0.233913	-12.3292	6.3048e-35	8.87855e-34
AGAP006740	AGAP006740	dolichyl-phosphate mannosyltransferase polypeptide 2, regulatory subunit	1307.9	-2.88073	0.249339	-11.5535	7.08769e-31	8.57165e-30
AGAP007752	AGAP007752	nan	40.4595	-2.87947	0.353927	-8.13577	4.09318e-16	2.41919e-15
AGAP002610	AGAP002610	nan	5.03221	-2.86364	0.720026	-3.97714	6.97499e-05	0.000157619
AGAP005301	AGAP005301	nan	45.0073	-2.85631	0.372103	-7.67613	1.63972e-14	8.73252e-14
AGAP008213	CYP6M3	cytochrome P450	104.607	-2.85259	0.306891	-9.29512	1.47038e-20	1.10819e-19
AGAP008207	CYP6Y2	cytochrome P450	86.0355	-2.84754	0.244882	-11.6282	2.96365e-31	3.65452e-30
AGAP008783	AGAP008783	Arginase [Source:UniProtKB/TrEMBL;Acc:A0A1S4H002]	1167.32	-2.84513	0.184706	-15.4035	1.54982e-53	4.01123e-52
AGAP008892	AGAP008892	nan	417.908	-2.84321	0.215906	-13.1688	1.3275e-39	2.18643e-38
AGAP010142	Dat	dopamine N-acetyltransferase	2530.64	-2.83829	0.159933	-17.7467	1.82768e-70	7.58525e-69
AGAP002789	AGAP002789	nan	5.70084	-2.83751	0.67624	-4.19601	2.71662e-05	6.41919e-05
AGAP003303	AGAP003303	nan	109.005	-2.83688	0.230863	-12.2881	1.04903e-34	1.46197e-33
AGAP002672	AGAP002672	nan	668.892	-2.83543	0.183775	-15.4288	1.04764e-53	2.72647e-52
AGAP006699	AGAP006699	hairy and enhancer of split, invertebrate	858.698	-2.8329	0.108635	-26.0774	6.58704e-150	1.06994e-147
AGAP012387	TOLL6	TOLL-like receptor 6	77.3246	-2.8281	0.366753	-7.71119	1.24652e-14	6.70671e-14
AGAP001590	AGAP001590	nan	302.039	-2.82384	0.218073	-12.949	2.37916e-38	3.76076e-37
AGAP013189	AGAP013189	nan	3067.59	-2.81773	0.182185	-15.4663	5.85753e-54	1.53715e-52
AGAP008632	AGAP008632	alpha-aminoadipic semialdehyde synthase	3981.69	-2.81268	0.159695	-17.6129	1.96282e-69	7.73712e-68	Dividing Granulocytes
AGAP011459	AGAP011459	nan	33.1253	-2.81205	0.317391	-8.85989	8.00967e-19	5.47598e-18
AGAP008288	TIM	timeless	7798.31	-2.80528	0.131128	-21.3934	1.54058e-101	1.33154e-99
AGAP004270	AGAP004270	hexosaminidase	24.5337	-2.79517	0.416751	-6.70705	1.98595e-11	8.53933e-11
AGAP028177	AGAP028177	nan	7.96952	-2.795	0.609017	-4.58936	4.446e-06	1.15774e-05
AGAP009330	AGAP009330	Troponin C isoform 4''	63.423	-2.78867	0.371276	-7.51105	5.86569e-14	2.99192e-13
AGAP008208	CYP6Y1	cytochrome P450	263.444	-2.78515	0.215529	-12.9224	3.36308e-38	5.27181e-37
AGAP000262	AGAP000262	nan	12.6655	-2.78401	0.580619	-4.7949	1.62755e-06	4.43795e-06
AGAP007601	AGAP007601	nan	537.94	-2.78108	0.220477	-12.6139	1.76954e-36	2.61298e-35
AGAP013770	AGAP013770	nan	73.4855	-2.78032	0.363959	-7.63909	2.18759e-14	1.15523e-13
AGAP001520	AGAP001520	protein phosphatase 1, regulatory (inhibitor) subunit 3	3229.13	-2.77822	0.152961	-18.1629	1.01454e-73	4.5514e-72
AGAP003849	AGAP003849	nan	13.1588	-2.77709	0.573596	-4.84155	1.28833e-06	3.54997e-06
AGAP029107	AGAP029107	nan	1012.85	-2.77268	0.237014	-11.6984	1.29917e-31	1.6147e-30
AGAP005496	LRIM12	leucine-rich immune protein (Short)	203.284	-2.76659	0.322473	-8.57932	9.54397e-18	6.18389e-17
AGAP028029	AGAP028029	nan	5.02627	-2.762	0.759123	-3.63841	0.000274325	0.000570386
AGAP011714	nan	nan	439.767	-2.76166	0.190393	-14.5051	1.12542e-47	2.46572e-46
AGAP006158	AGAP006158	nan	36.2487	-2.76064	0.321879	-8.57664	9.76845e-18	6.32498e-17
AGAP008009	AGAP008009	RYK receptor-like tyrosine kinase [Source:UniProtKB/TrEMBL;Acc:A0A1S4GWY8]	4.41505	-2.76032	0.732854	-3.76653	0.000165534	0.000355562
AGAP005103	AGAP005103	nan	477.425	-2.75987	0.206056	-13.3938	6.57512e-41	1.13689e-39
AGAP004976	PPO8	prophenoloxidase 8	43.9088	-2.74767	0.243441	-11.2868	1.5251e-29	1.74369e-28
AGAP007801	AGAP007801	vrille	2468.9	-2.74709	0.085283	-32.2115	1.21812e-227	5.73795e-225
AGAP028400	AGAP028400	nan	5.69647	-2.74476	0.761546	-3.60419	0.000313127	0.000645648
AGAP008142	nan	nan	22.9965	-2.74411	0.475466	-5.77142	7.8605e-09	2.69679e-08
AGAP001480	AGAP001480	nan	1445.71	-2.74352	0.0970232	-28.2769	6.64207e-176	1.78785e-173
AGAP012295	CYP9L1	cytochrome P450	635.658	-2.73894	0.174859	-15.6637	2.67983e-55	7.36056e-54
AGAP005776	PDH	pigment dispersing hormone	28.7152	-2.73843	0.507535	-5.39554	6.83162e-08	2.13823e-07
AGAP002641	AGAP002641	nan	9.02265	-2.72906	0.632893	-4.31204	1.61757e-05	3.92154e-05
AGAP004534	AGAP004534	cathepsin B precursor	86.8145	-2.72869	0.204321	-13.355	1.10832e-40	1.9019e-39
AGAP007094	AGAP007094	nan	7.2668	-2.72747	0.600087	-4.54513	5.49007e-06	1.41587e-05
AGAP000968	AGAP000968	nan	94.3562	-2.72582	0.231091	-11.7954	4.12248e-32	5.22015e-31
AGAP002341	AGAP002341	nan	1003.58	-2.7234	0.196654	-13.8487	1.29596e-43	2.48155e-42
AGAP007339	AGAP007339	troponin C, isoform 3	44.4005	-2.72063	0.313391	-8.68128	3.91329e-18	2.58898e-17
AGAP009176	AGAP009176	fatty acid synthase, animal type	33667.3	-2.71993	0.183319	-14.8371	8.43178e-50	1.92338e-48
AGAP000167	AGAP000167	Lipid storage droplets surface-binding protein 2	9070.63	-2.71444	0.0793043	-34.2281	9.22556e-257	7.90128e-254	Granulocytes
AGAP010269	AGAP010269	ANK_REP_REGION domain-containing protein [Source:UniProtKB/TrEMBL;Acc:A0A1S4H4F7]	68.6842	-2.71322	0.253623	-10.6978	1.0417e-26	1.04292e-25
AGAP013400	AGAP013400	nan	5086.34	-2.70316	0.173143	-15.6123	6.00712e-55	1.62624e-53
AGAP005739	nan	nan	138.027	-2.70061	0.401091	-6.73316	1.66021e-11	7.17472e-11
AGAP007647	AGAP007647	nan	3027.8	-2.69988	0.158315	-17.0538	3.27409e-65	1.14241e-63
AGAP004157	AGAP004157	synaptic vesicle protein	31.658	-2.69947	0.30218	-8.93329	4.13507e-19	2.87927e-18
AGAP005834	COEJHE2E	carboxylesterase	258.839	-2.68765	0.281151	-9.55945	1.18386e-21	9.45181e-21
AGAP009218	AGAP009218	nan	526.027	-2.68672	0.586525	-4.58075	4.63322e-06	1.20446e-05
AGAP002503	AGAP002503	4-coumarate:CoA ligase	3661.12	-2.68628	0.176518	-15.2181	2.68018e-52	6.67989e-51
AGAP010969	AGAP010969	Roundabout 1	62.0146	-2.68217	0.269886	-9.93814	2.84093e-23	2.41774e-22
AGAP012216	AGAP012216	sterol O-acyltransferase	169.461	-2.68193	0.211483	-12.6815	7.48376e-37	1.11735e-35
AGAP007738	AGAP007738	nan	221.051	-2.68172	0.217835	-12.3108	7.92426e-35	1.11093e-33
AGAP005740	nan	nan	41.0247	-2.67365	0.43565	-6.13714	8.40181e-10	3.18525e-09
AGAP002268	AGAP002268	nan	4372.37	-2.66489	0.202669	-13.149	1.72456e-39	2.83049e-38
AGAP003934	AGAP003934	Battenin [Source:UniProtKB/TrEMBL;Acc:Q7Q2B1]	810.702	-2.66154	0.0961239	-27.6887	9.55859e-169	2.14408e-166
AGAP001127	AGAP001127	P37NB protein	576.584	-2.66077	0.179374	-14.8336	8.88369e-50	2.0167e-48
AGAP005992	CYP302A1	cytochrome P450	80.4973	-2.65185	0.269839	-9.82754	8.56846e-23	7.15e-22
AGAP000180	AGAP000180	phosphoribosylaminoimidazole carboxylase	5773.79	-2.64949	0.224682	-11.7922	4.28269e-32	5.41574e-31
AGAP004954	AGAP004954	rhythmically expressed gene 2 protein	313.426	-2.64904	0.220844	-11.995	3.77261e-33	4.96393e-32
AGAP002835	AGAP002835	alpha-tocopherol transfer protein-like protein	53.4835	-2.64695	0.281295	-9.40988	4.96717e-21	3.82631e-20
AGAP007754	AGAP007754	nan	1841.39	-2.64562	0.122033	-21.6795	3.20129e-104	3.01594e-102
AGAP007165	AGAP007165	Late trypsin	9.33985	-2.64114	0.533336	-4.95211	7.34118e-07	2.07692e-06
AGAP006467	AGAP006467	nan	20.2504	-2.64044	0.370633	-7.12415	1.04729e-12	4.93078e-12
AGAP003097	AGAP003097	yellow protein	84.2788	-2.63669	0.293938	-8.97021	2.95951e-19	2.08071e-18
AGAP011924	AGAP011924	Potassium channel subfamily K, invertebrate [Source:UniProtKB/TrEMBL;Acc:A0A1S4H903]	79.1578	-2.63404	0.205697	-12.8054	1.52893e-37	2.3652e-36
AGAP007711	AGAP007711	nan	6245.88	-2.63162	0.193919	-13.5707	5.97309e-42	1.06175e-40	Dividing Granulocytes
AGAP009770	GPRCAL1	putative calcitonin receptor 1	370.073	-2.63161	0.254238	-10.351	4.14188e-25	3.85961e-24
AGAP028580	AGAP028580	nan	107.349	-2.63083	0.263657	-9.97824	1.89803e-23	1.62557e-22
AGAP009414	AGAP009414	1-acyl-sn-glycerol-3-phosphate acyltransferase alpha	792.162	-2.62033	0.195822	-13.3811	7.79382e-41	1.34233e-39
AGAP002718	AGAP002718	4-coumarate:CoA ligase isoform 2 [Source:UniProtKB/TrEMBL;Acc:Q7QCM8]	1450.96	-2.616	0.170348	-15.3568	3.18945e-53	8.18741e-52
AGAP007198	AGAP007198	nan	756.121	-2.61341	0.162275	-16.1048	2.3612e-58	7.17575e-57
AGAP003483	AGAP003483	nan	394.559	-2.60805	0.21797	-11.9652	5.40774e-33	7.08572e-32
AGAP002069	AGAP002069	decaprenyl-diphosphate synthase subunit 1	36.9607	-2.60649	0.343859	-7.58011	3.45261e-14	1.78917e-13
AGAP001779	AGAP001779	nan	200.711	-2.60648	0.189869	-13.7278	6.92004e-43	1.28082e-41
AGAP028646	ANCE3	angiotensin-converting enzyme 3	31.9498	-2.60621	0.299854	-8.69158	3.57438e-18	2.37143e-17
AGAP000290	CLIPA27	CLIP-domain serine protease	3535.04	-2.60263	0.176049	-14.7836	1.86988e-49	4.22449e-48	Granulocytes
AGAP001524	AGAP001524	nan	71.7487	-2.59967	0.284851	-9.12642	7.07987e-20	5.16249e-19
AGAP008982	AGAP008982	CzcD (Cation-efflux system membrane protein) [Source:UniProtKB/TrEMBL;Acc:A0A1S4GZT7]	356.807	-2.59916	0.228969	-11.3516	7.28096e-30	8.46838e-29
AGAP007029	AGAP007029	glucosyl/glucuronosyl transferases	527.445	-2.59726	0.179214	-14.4925	1.35051e-47	2.93838e-46
AGAP010860	AGAP010860	sodium-dependent nutrient amino acid transporter 2	700.333	-2.59596	0.218981	-11.8547	2.03445e-32	2.61838e-31
AGAP008143	AGAP008143	nan	23.8459	-2.59551	0.422379	-6.14498	7.99724e-10	3.03676e-09
AGAP007163	AGAP007163	3',5'-cyclic-nucleotide phosphodiesterase	313.286	-2.59461	0.185428	-13.9925	1.73114e-44	3.38362e-43
AGAP012477	AGAP012477	gamma-butyrobetaine dioxygenase	43.7311	-2.58874	0.354173	-7.30925	2.68647e-13	1.31204e-12
AGAP011322	AGAP011322	fibulin 2	10.4308	-2.58862	0.650418	-3.97993	6.89343e-05	0.000155926
AGAP013537	AGAP013537	nan	15.5649	-2.5863	0.513215	-5.0394	4.66996e-07	1.34915e-06
AGAP006579	AGAP006579	nan	18.5285	-2.58623	0.51207	-5.05053	4.40577e-07	1.27595e-06
AGAP006548	AGAP006548	glycine cleavage system H protein	3029.34	-2.58562	0.238229	-10.8535	1.91878e-27	1.99084e-26
AGAP002084	AGAP002084	glycerol-3-phosphate O-acyltransferase 3/4	1244.1	-2.57833	0.209979	-12.279	1.1747e-34	1.62988e-33
AGAP012307	AGAP012307	Spondin-1	15733	-2.57153	0.178068	-14.4413	2.84551e-47	6.06505e-46
AGAP005581	AGAP005581	3-hydroxyisobutyrate dehydrogenase [Source:UniProtKB/TrEMBL;Acc:Q7PNN6]	4012.07	-2.56521	0.172908	-14.8357	8.61132e-50	1.95959e-48
AGAP001561	GPRNNA5	putative GPCR class a orphan receptor 5	39.8573	-2.56234	0.30019	-8.53575	1.3925e-17	8.95477e-17
AGAP009364	AGAP009364	nan	32.8702	-2.56015	0.446587	-5.73269	9.88478e-09	3.36798e-08
AGAP005783	AGAP005783	nan	129.288	-2.5592	0.216922	-11.7978	4.00764e-32	5.08156e-31
AGAP011427	nan	nan	197.797	-2.55541	0.250123	-10.2166	1.67081e-24	1.50054e-23
AGAP010632	nan	nan	559.977	-2.5496	0.249088	-10.2357	1.37148e-24	1.23643e-23
AGAP004600	nan	nan	197.438	-2.54482	0.153118	-16.62	4.99063e-62	1.61016e-60
AGAP007920	AGAP007920	glucuronosyltransferase	1090.98	-2.5407	0.20742	-12.2491	1.69933e-34	2.35087e-33
AGAP009763	AGAP009763	nan	108.051	-2.53544	0.250918	-10.1046	5.26959e-24	4.65711e-23
AGAP002449	AGAP002449	3-OH androgenic UDPGT	10.2673	-2.53521	0.489361	-5.18066	2.21103e-07	6.60646e-07
AGAP002156	GPRGNR1	putative gonadotrophin releasing hormone receptor 1	1190.96	-2.53504	0.203797	-12.4391	1.60396e-35	2.31053e-34
AGAP003759	AGAP003759	juvenile hormone-inducible protein	900.466	-2.53282	0.211615	-11.969	5.16558e-33	6.7873e-32	Granulocytes
AGAP006698	AGAP006698	nan	20.9079	-2.5231	0.371038	-6.80012	1.04529e-11	4.59101e-11
AGAP009472	ABCG20	ATP-binding cassette transporter (ABC transporter) family G member 20 [Source:UniProtKB/TrEMBL;Acc:A0A1S4H231]	63.0361	-2.51769	0.274982	-9.15585	5.39325e-20	3.95407e-19
AGAP010887	CPR113	cuticular protein RR-2 family 113	16.3553	-2.51561	0.522842	-4.81142	1.49864e-06	4.10428e-06
AGAP009757	ANCE7	angiotensin-converting enzyme 7	10.4647	-2.50854	0.501771	-4.99938	5.75158e-07	1.64598e-06
AGAP003422	AGAP003422	endoplasmic reticulum metallopeptidase 1	125.956	-2.50795	0.23385	-10.7246	7.80256e-27	7.87866e-26
AGAP006741	AGAP006741	nan	578.501	-2.50496	0.243305	-10.2955	7.37979e-25	6.75e-24
AGAP002250	AGAP002250	calcium/calmodulin-dependent protein kinase kinase	527.505	-2.5037	0.219284	-11.4176	3.41461e-30	4.04642e-29
AGAP012399	AGAP012399	maltase	3023.91	-2.50329	0.117571	-21.2917	1.35601e-100	1.1509e-98
AGAP006569	AGAP006569	acetyl-CoA synthetase	716.521	-2.50317	0.106101	-23.5923	4.62467e-123	5.8092e-121
AGAP007761	AGAP007761	Complement control protein	14.7863	-2.50288	0.508633	-4.9208	8.61892e-07	2.41807e-06
AGAP009312	AGAP009312	nan	9.58656	-2.4938	0.551036	-4.52566	6.02074e-06	1.54368e-05
AGAP011750	AGAP011750	alpha-N-acetylglucosaminidase	722.334	-2.49365	0.234851	-10.618	2.45678e-26	2.42106e-25
AGAP009347	AGAP009347	FK506-binding protein 4/5	3624.89	-2.48484	0.168912	-14.7109	5.48884e-49	1.22247e-47
AGAP009556	AGAP009556	nan	559.316	-2.47441	0.196467	-12.5945	2.26295e-36	3.33114e-35
AGAP006819	AGAP006819	abhydrolase domain-containing protein 1/3	631.818	-2.47002	0.203186	-12.1565	5.29825e-34	7.24453e-33
AGAP002826	AGAP002826	nan	33.9131	-2.46967	0.656641	-3.76106	0.000169195	0.00036293
AGAP009896	AGAP009896	proton-coupled amino acid transporter	69.8293	-2.46653	0.259568	-9.50244	2.05032e-21	1.6232e-20
AGAP011509	COEunkn	carboxylesterase	420.335	-2.45843	0.309178	-7.95149	1.84278e-15	1.04836e-14
AGAP000095	AGAP000095	anoctamin 5	4124.77	-2.45805	0.0771899	-31.8442	1.58455e-222	6.78546e-220
AGAP008557	AGAP008557	AMP-binding domain protein	292.756	-2.45199	0.199458	-12.2932	9.84826e-35	1.37452e-33
AGAP000698	AGAP000698	nan	981.787	-2.44669	0.0812901	-30.0982	5.11284e-199	1.66097e-196	Granulocytes
AGAP002109	AGAP002109	solute carrier family 31 (copper transporter), member 1	5710.07	-2.44418	0.239852	-10.1904	2.18898e-24	1.95844e-23
AGAP012813	AGAP012813	nan	152.58	-2.43972	0.188284	-12.9577	2.1264e-38	3.36687e-37
AGAP001884	AGAP001884	fumarate hydratase, class II	11280.3	-2.43863	0.169245	-14.4089	4.55178e-47	9.57194e-46	Oenocytoids
AGAP007662	AGAP007662	All-trans/9-cis	11.9938	-2.43648	0.451542	-5.39591	6.81775e-08	2.1346e-07
AGAP005617	AGAP005617	nan	3311.35	-2.43499	0.113438	-21.4653	3.28606e-102	2.86648e-100
AGAP009609	AGAP009609	homogentisate 1,2-dioxygenase	22.0764	-2.42758	0.399754	-6.07268	1.25793e-09	4.69501e-09
AGAP001989	AGAP001989	nan	4244.18	-2.41921	0.201449	-12.009	3.18551e-33	4.20318e-32
AGAP003927	ILP5	Insulin-like peptide 5	32.0637	-2.41813	0.540839	-4.47106	7.78321e-06	1.969e-05
AGAP011197	AGAP011197	nan	15631.9	-2.41797	0.311742	-7.75631	8.74367e-15	4.78641e-14	Granulocytes
AGAP004802	AGAP004802	4-hydroxyphenylpyruvate dioxygenase [Source:UniProtKB/TrEMBL;Acc:Q7Q2T3]	135.189	-2.41374	0.27078	-8.91404	4.92069e-19	3.41117e-18
AGAP012391	AGAP012391	nan	24.8364	-2.41288	0.397894	-6.06412	1.32681e-09	4.93677e-09
AGAP003579	AGAP003579	cadherin-87A	139.194	-2.41213	0.174309	-13.8382	1.49847e-43	2.84045e-42
AGAP004620	AGAP004620	Envelysin	15.5825	-2.41198	0.425421	-5.66964	1.43097e-08	4.79074e-08
AGAP028196	AGAP028196	nan	266.574	-2.40982	0.217298	-11.0899	1.404e-28	1.53982e-27
AGAP002891	GPRMGL4	putative metabotropic glutamate receptor 4	373.811	-2.40717	0.219247	-10.9793	4.80847e-28	5.11871e-27
AGAP002738	SCRB5	Class B Scavenger Receptor (CD36 domain).	38.2172	-2.40435	0.311205	-7.72594	1.11032e-14	6.01859e-14
AGAP002761	AGAP002761	3-methylcrotonyl-CoA carboxylase beta subunit	1711.81	-2.40418	0.202349	-11.8813	1.4801e-32	1.91276e-31
AGAP000131	AGAP000131	nan	29.2005	-2.40392	0.313466	-7.66885	1.73551e-14	9.23222e-14
AGAP011715	nan	nan	2052.03	-2.40342	0.105342	-22.8154	3.22848e-115	3.755e-113
AGAP008688	AGAP008688	nan	3288.39	-2.40244	0.191525	-12.5437	4.30178e-36	6.29302e-35
AGAP002925	AGAP002925	poly(U)-specific endoribonuclease	6803.75	-2.40173	0.24589	-9.76751	1.55225e-22	1.28504e-21
AGAP007095	AGAP007095	nan	8.07569	-2.40027	0.570549	-4.20695	2.58844e-05	6.13015e-05
AGAP011231	AGAP011231	fibrinogen	77.3635	-2.39778	0.392325	-6.11173	9.85592e-10	3.71262e-09
AGAP000327	AGAP000327	tyrosine aminotransferase	1656.41	-2.39708	0.224462	-10.6792	1.2738e-26	1.27258e-25
AGAP003358	AGAP003358	Sugar transporter SWEET [Source:UniProtKB/TrEMBL;Acc:A0NDW1]	110.059	-2.39676	0.300386	-7.97895	1.47585e-15	8.44202e-15
AGAP011052	nan	nan	857.996	-2.39624	0.162271	-14.7669	2.39414e-49	5.38309e-48
AGAP006637	AGAP006637	Oatp58Dc	12.5469	-2.39455	0.685833	-3.49145	0.000480403	0.000965212
AGAP011830	AGAP011830	myo-inositol-1-phosphate synthase	34.5552	-2.38902	0.381936	-6.25504	3.97412e-10	1.55547e-09
AGAP003267	AGAP003267	nan	45.6408	-2.38562	0.300668	-7.93442	2.11486e-15	1.19592e-14
AGAP011158	AGAP011158	Kynurenine--oxoglutarate transaminase 3 isoform 1	2474.65	-2.38431	0.109526	-21.7693	4.53063e-105	4.35541e-103	Oenocytoids
AGAP007664	AGAP007664	coiled-coil domain-containing protein 34	27.8498	-2.38431	0.383758	-6.21305	5.19672e-10	2.00896e-09
AGAP007675	AGAP007675	dynein, axonemal heavy chain	6.36055	-2.38025	0.644061	-3.69569	0.000219288	0.000463625
AGAP000238	AGAP000238	nan	703.056	-2.38016	0.240241	-9.90737	3.86679e-23	3.27305e-22
AGAP007781	AGAP007781	eukaryotic translation initiation factor 4E-binding protein 1	14699.9	-2.37887	0.06933	-34.3122	5.15999e-258	5.40136e-255
AGAP012000	AGAP012000	fibrinogen and fibronectin	4234.79	-2.37771	0.192351	-12.3613	4.23122e-35	6.01242e-34	Oenocytoids
AGAP008012	AGAP008012	nan	596.142	-2.37713	0.218318	-10.8884	1.3098e-27	1.36349e-26
AGAP000015	AGAP000015	proto-oncogene tyrosine-protein kinase ROS	56.84	-2.37698	0.296507	-8.01661	1.08705e-15	6.27132e-15
AGAP003005	AGAP003005	serine/threonine-protein kinase SIK	567.699	-2.37675	0.142235	-16.71	1.10866e-62	3.63925e-61
AGAP012742	AGAP012742	nan	8.23645	-2.37314	0.5079	-4.67246	2.97616e-06	7.89368e-06
AGAP010645	AGAP010645	nan	625.913	-2.37257	0.240893	-9.84907	6.91789e-23	5.77778e-22
AGAP006743	AGAP006743	nan	1458.17	-2.37215	0.190094	-12.4789	9.73705e-36	1.41782e-34	Oenocytoids
AGAP005302	AGAP005302	DIRAS family, GTP-binding Ras-like 2	68.589	-2.36868	0.290635	-8.15004	3.63803e-16	2.15288e-15
AGAP001293	AGAP001293	nan	24.5306	-2.36509	0.310843	-7.60863	2.77013e-14	1.44825e-13
AGAP009405	CPAP3-E	cuticular protein	75.4478	-2.36386	0.237888	-9.93689	2.87681e-23	2.44607e-22
AGAP000278	OBP9	odorant-binding protein 9	136.522	-2.36121	0.229773	-10.2763	9.01486e-25	8.16625e-24
AGAP009381	AGAP009381	Cellular retinaldehyde-binding protein [Source:UniProtKB/TrEMBL;Acc:A0A1S4H0Z1]	25.7226	-2.35942	0.50462	-4.67564	2.93042e-06	7.77675e-06
AGAP007692	SRPN14	serine protease inhibitor (serpin) 14	234.911	-2.35911	0.215701	-10.9369	7.67766e-28	8.08171e-27
AGAP006018	AGAP006018	nan	82.4562	-2.35839	0.212719	-11.0868	1.45341e-28	1.59031e-27
AGAP004106	AGAP004106	nan	155.19	-2.35564	0.20363	-11.5682	5.97053e-31	7.2485e-30
AGAP002457	AGAP002457	nan	22.7808	-2.35534	0.44747	-5.26368	1.41202e-07	4.28979e-07
AGAP008582	AGAP008582	Alpha-mannosidase [Source:UniProtKB/TrEMBL;Acc:A0A1S4GYP5]	44.6842	-2.35279	0.25105	-9.37179	7.13126e-21	5.47098e-20
AGAP006728	AGAP006728	nan	27.5541	-2.35272	0.420002	-5.60169	2.12274e-08	6.99488e-08
AGAP000553	white	protein white	69.5525	-2.35071	0.341576	-6.88197	5.90298e-12	2.64316e-11
AGAP009635	AGAP009635	nan	15.4948	-2.34411	0.535977	-4.37353	1.22252e-05	3.01028e-05
AGAP006724	COEAE3G	carboxylesterase	47.2679	-2.3378	0.36932	-6.33	2.45154e-10	9.74511e-10
AGAP001717	AGAP001717	nan	21.0105	-2.33723	0.468487	-4.98889	6.07266e-07	1.73313e-06
AGAP028648	AGAP028648	nan	510.247	-2.33337	0.216898	-10.7579	5.43989e-27	5.52255e-26
AGAP010766	AGAP010766	nan	17.74	-2.33275	0.436642	-5.34247	9.16865e-08	2.83299e-07
AGAP003238	AGAP003238	N-myc downstream regulated	1764.02	-2.33189	0.210024	-11.103	1.21359e-28	1.33566e-27
AGAP007525	AGAP007525	coronin homolog	483.017	-2.33048	0.129229	-18.0337	1.06008e-72	4.66682e-71
AGAP009109	AGAP009109	nan	656.568	-2.32919	0.117079	-19.8942	4.56758e-88	2.92729e-86
AGAP005095	AGAP005095	actin beta/gamma 1	571.591	-2.32904	0.233556	-9.97208	2.01957e-23	1.7281e-22
AGAP009415	AGAP009415	lysophosphatidate acyltransferase	191.788	-2.32752	0.218034	-10.675	1.33206e-26	1.32797e-25
AGAP012052	nan	nan	10.0521	-2.32651	0.574571	-4.04913	5.14087e-05	0.000117754
AGAP009688	AGAP009688	Leucine-rich repeats and immunoglobulin-like domains protein 3	74.0276	-2.32561	0.281083	-8.27375	1.29807e-16	7.83919e-16
AGAP011948	AGAP011948	threonine 3-dehydrogenase	947.616	-2.3199	0.169674	-13.6727	1.4782e-42	2.7041e-41
AGAP009848	nan	nan	6.61977	-2.31891	0.636689	-3.64215	0.000270373	0.000562913
AGAP003030	AGAP003030	Pyruvate dehydrogenase E1 component subunit alpha [Source:UniProtKB/TrEMBL;Acc:Q7QDA6]	1193.86	-2.31321	0.167202	-13.8349	1.57042e-43	2.97087e-42
AGAP011523	AGAP011523	nan	58.4288	-2.31263	0.386862	-5.97792	2.26011e-09	8.20836e-09
AGAP013439	AGAP013439	nan	32.3702	-2.31148	0.323277	-7.15015	8.66827e-13	4.11197e-12
AGAP004119	AGAP004119	cGMP-specific 3', 5'-cyclic phosphodiesterase	135.309	-2.31117	0.173707	-13.305	2.16381e-40	3.66642e-39
AGAP010508	AGAP010508	proton-coupled amino acid transporter	82.2617	-2.30662	0.254572	-9.06077	1.29533e-19	9.29737e-19
AGAP012019	AGAP012019	nan	257.542	-2.30616	0.196729	-11.7225	9.77371e-32	1.21958e-30
AGAP012662	AGAP012662	omega-amidase	919.739	-2.30579	0.24356	-9.46703	2.87909e-21	2.25657e-20
AGAP002663	AGAP002663	nan	76.0959	-2.30155	0.279129	-8.24544	1.64551e-16	9.89302e-16
AGAP011940	AGAP011940	nan	23493.8	-2.3007	0.15894	-14.4753	1.73554e-47	3.733e-46	Granulocytes
AGAP028892	LSU_rRNA_eukarya	Eukaryotic large subunit ribosomal RNA [Source:RFAM;Acc:RF02543]	383.839	-2.30019	0.385997	-5.95908	2.53662e-09	9.13512e-09
AGAP005564	AGAP005564	CP2 domain-containing protein [Source:UniProtKB/TrEMBL;Acc:A7UTR5]	11.7002	-2.29978	0.412819	-5.57092	2.53403e-08	8.27777e-08
AGAP001659	AGAP001659	hexamerin	13.2906	-2.29833	0.473505	-4.85387	1.21073e-06	3.34497e-06
AGAP012954	AGAP012954	nan	72.0532	-2.29493	0.295997	-7.75324	8.95762e-15	4.89784e-14
AGAP005370	COEBE4C	carboxylesterase beta esterase	16.5311	-2.29184	0.473465	-4.84058	1.2946e-06	3.56517e-06
AGAP008704	AGAP008704	Juvenile hormone-inducible protein [Source:UniProtKB/TrEMBL;Acc:A0A1S4GZS3]	421.929	-2.28768	0.208779	-10.9574	6.12395e-28	6.48244e-27
AGAP004318	CLIPC3	CLIP-domain serine protease	1204.74	-2.28722	0.205237	-11.1443	7.6366e-29	8.47402e-28
AGAP004262	TO3	takeout 3	29.1145	-2.28691	0.327427	-6.9845	2.85881e-12	1.30805e-11
AGAP006047	CYP4J9	cytochrome P450	102.844	-2.28442	0.197525	-11.5652	6.18441e-31	7.4985e-30
AGAP011503	AGAP011503	nan	642.36	-2.28294	0.22055	-10.3511	4.13535e-25	3.85734e-24
AGAP012577	AGAP012577	nan	3224.89	-2.2818	0.242421	-9.41254	4.84298e-21	3.73369e-20
AGAP003578	AGAP003578	aldehyde dehydrogenase (NAD+)	2418.5	-2.28131	0.0915948	-24.9066	6.3135e-137	9.44119e-135	Granulocytes
AGAP004762	AGAP004762	alpha-tocopherol transfer protein-like protein	85.5035	-2.28113	0.246685	-9.24716	2.30543e-20	1.71967e-19
AGAP001470	AGAP001470	nan	17971.9	-2.28109	0.199421	-11.4386	2.68319e-30	3.20385e-29	Granulocytes
AGAP003168	AGAP003168	Isocitrate dehydrogenase [NADP] [Source:UniProtKB/TrEMBL;Acc:Q7PQQ3]	6440.11	-2.27521	0.180509	-12.6044	1.99719e-36	2.94453e-35
AGAP007334	AGAP007334	Tektin [Source:UniProtKB/TrEMBL;Acc:Q7QJ75]	29.2657	-2.27501	0.302065	-7.53153	5.01499e-14	2.57472e-13
AGAP008889	ABCG15	ATP-binding cassette transporter (ABC transporter) family G member 15	182.714	-2.26579	0.251098	-9.02351	1.82163e-19	1.29619e-18
AGAP003773	AGAP003773	nan	703.878	-2.2652	0.232275	-9.75222	1.80474e-22	1.47847e-21
AGAP003301	AGAP003301	M-phase inducer phosphatase	714.854	-2.26053	0.205155	-11.0186	3.10743e-28	3.34191e-27
AGAP001116	AGAP001116	D-amino-acid oxidase	916.293	-2.26043	0.204074	-11.0765	1.63119e-28	1.7807e-27
AGAP012165	nan	nan	7.09811	-2.25838	0.532812	-4.2386	2.24916e-05	5.36302e-05
AGAP028764	aga-mir-34	nan	9.22155	-2.25816	0.452536	-4.99002	6.03724e-07	1.72406e-06
AGAP001657	AGAP001657	hexamerin	23.7941	-2.2553	0.363822	-6.19893	5.685e-10	2.18606e-09
AGAP013540	AGAP013540	nan	99.6079	-2.25503	0.244616	-9.21868	3.0078e-20	2.23298e-19
AGAP007279	AGAP007279	nan	293.691	-2.25085	0.213126	-10.5612	4.51074e-26	4.381e-25
AGAP011984	AGAP011984	UDP-N-acetyl-alpha-D-galactosamine:polypeptide N-acetylgalactosaminyltransferase 20	4104.57	-2.24819	0.197593	-11.3779	5.38698e-30	6.33592e-29	Granulocytes
AGAP008614	AGAP008614	nan	116.77	-2.24277	0.208689	-10.7469	6.12674e-27	6.21313e-26
AGAP001987	AGAP001987	nan	91.894	-2.24115	0.260145	-8.61498	6.99526e-18	4.56387e-17
AGAP009115	AGAP009115	phosphatidylinositol phospholipase C, beta	121.799	-2.24087	0.153089	-14.6377	1.61471e-48	3.57934e-47
AGAP029185	AGAP029185	nan	6259.03	-2.24057	0.208069	-10.7684	4.85248e-27	4.94219e-26
AGAP007881	AGAP007881	Steroid dehydrogenase	75.5187	-2.24012	0.20819	-10.76	5.31949e-27	5.40614e-26
AGAP000128	AGAP000128	MFS transporter, VNT family, synaptic vesicle glycoprotein 2	190.229	-2.23901	0.255774	-8.75385	2.0619e-18	1.37767e-17
AGAP003449	AGAP003449	rootletin	132.805	-2.23846	0.22855	-9.7942	1.1924e-22	9.8887e-22
AGAP010640	AGAP010640	nan	3865.77	-2.23818	0.183016	-12.2294	2.16425e-34	2.98527e-33
AGAP013036	AGAP013036	nan	47.3192	-2.2365	0.279978	-7.98811	1.37024e-15	7.85219e-15
AGAP009131	AGAP009131	nan	27.7633	-2.23481	0.34667	-6.44651	1.14452e-10	4.65967e-10
AGAP000156	AGAP000156	nan	28.4122	-2.23148	0.314989	-7.08432	1.39724e-12	6.5133e-12
AGAP003328	AGAP003328	NADH dehydrogenase (ubiquinone) 1 alpha subcomplex 6	105.323	-2.2301	0.396916	-5.61857	1.92548e-08	6.36714e-08
AGAP007014	AGAP007014	Amino_oxidase domain-containing protein [Source:UniProtKB/TrEMBL;Acc:A0A1S4GTW6]	31.9757	-2.22594	0.440779	-5.05002	4.41757e-07	1.27898e-06
AGAP013290	LRIM27	leucine-rich immune protein (Coil-less)	401.682	-2.22557	0.23635	-9.4164	4.66818e-21	3.60188e-20
AGAP028564	AGAP028564	nan	1831.47	-2.22444	0.183259	-12.1383	6.6206e-34	8.97448e-33
AGAP012008	AGAP012008	nan	207.212	-2.21983	0.22623	-9.81224	9.97317e-23	8.30011e-22
AGAP012053	AGAP012053	alpha,alpha-trehalase	4513.24	-2.21955	0.144391	-15.3718	2.53072e-53	6.53202e-52
AGAP009144	AGAP009144	nan	360.442	-2.21821	0.141872	-15.6353	4.18545e-55	1.13963e-53
AGAP004376	AGAP004376	aldose 1-epimerase	454.806	-2.217	0.204733	-10.8287	2.51583e-27	2.59602e-26	Oenocytoids
AGAP004306	AGAP004306	nan	6.12836	-2.21553	0.592988	-3.7362	0.000186819	0.000398737
AGAP006907	AGAP006907	Cat eye syndrome chromosome region, candidate 1a	1136.74	-2.21291	0.116955	-18.9211	7.64914e-80	4.21418e-78
AGAP010473	AGAP010473	Pleckstrin-like proteiny domain-containing family G member 5	18.2736	-2.21211	0.432583	-5.11372	3.1588e-07	9.2997e-07
AGAP002324	AGAP002324	mitochondrial sodium/hydrogen exchanger NHA2	498.562	-2.21083	0.229574	-9.63014	5.96462e-22	4.8234e-21
AGAP000299	AGAP000299	nan	255.254	-2.20529	0.126344	-17.4547	3.17072e-68	1.20449e-66
AGAP012290	AGAP012290	nan	131.239	-2.20335	0.187991	-11.7205	1.00038e-31	1.24664e-30
AGAP004118	SCRAL1	Class A Scavenger Receptor (SRCR domain) with Lysyl Oxidase domain.	14.0256	-2.2027	0.442032	-4.98313	6.25627e-07	1.78391e-06
AGAP007790	AGAP007790	Sodium/potassium-transporting ATPase subunit beta [Source:UniProtKB/TrEMBL;Acc:A0A1S4GW77]	5685.59	-2.20267	0.105999	-20.7802	6.54492e-96	4.85509e-94
AGAP001713	AGAP001713	stearoyl-CoA desaturase (delta-9 desaturase)	24038.5	-2.20052	0.220739	-9.96886	2.08606e-23	1.78175e-22
AGAP003751	CPAP1-C	cuticular protein	107.407	-2.19811	0.195245	-11.2582	2.10985e-29	2.39481e-28
AGAP012679	AGAP012679	nan	23.4968	-2.19714	0.435103	-5.0497	4.42501e-07	1.28074e-06
AGAP012275	AGAP012275	nan	113.519	-2.19405	0.238157	-9.21261	3.18275e-20	2.361e-19
AGAP007049	AGAP007049	nan	3830.84	-2.19346	0.246911	-8.8836	6.47324e-19	4.44817e-18	Megacytes
AGAP001283	AGAP001283	potassium inwardly-rectifying channel subfamily J	22.1944	-2.1934	0.325675	-6.73495	1.63985e-11	7.08994e-11
AGAP003441	AGAP003441	nan	14.2669	-2.1926	0.369707	-5.93064	3.01748e-09	1.08131e-08
AGAP000097	AGAP000097	solute carrier family 25	2876.95	-2.18998	0.207764	-10.5407	5.60827e-26	5.42459e-25
AGAP006756	AGAP006756	nan	103.631	-2.18946	0.199619	-10.9682	5.436e-28	5.76069e-27
AGAP027997	LRIM5	leucine-rich immune protein (Short)	1455.96	-2.18831	0.195986	-11.1656	6.00569e-29	6.68789e-28
AGAP011643	AGAP011643	nan	10.6236	-2.18827	0.617466	-3.54396	0.00039417	0.000800836
AGAP028636	AGAP028636	nan	1573.61	-2.18549	0.267364	-8.17424	2.97744e-16	1.7731e-15
AGAP010365	AGAP010365	nan	8.42001	-2.18128	0.497262	-4.38658	1.15145e-05	2.84645e-05
AGAP000023	AGAP000023	nan	18.0494	-2.17825	0.540189	-4.03238	5.52155e-05	0.000126075
AGAP002178	AGAP002178	homeobox protein homothorax	44.5425	-2.17474	0.241279	-9.01339	1.99778e-19	1.41832e-18
AGAP013476	AGAP013476	nan	14.4147	-2.17388	0.529416	-4.10618	4.02251e-05	9.31794e-05
AGAP006638	AGAP006638	Oatp58Dc	12.6634	-2.17003	0.563396	-3.85169	0.000117306	0.000257068
AGAP000571	CLIPC5	CLIP-domain serine protease	10.8571	-2.16558	0.59978	-3.61063	0.000305454	0.000630656
AGAP002377	AGAP002377	fatty-acid amide hydrolase 2	68.9085	-2.16351	0.309081	-6.9998	2.5633e-12	1.17684e-11
AGAP008311	AGAP008311	acylphosphatase	7988.93	-2.16199	0.250411	-8.63377	5.93622e-18	3.89722e-17
AGAP002419	CYP4D22	cytochrome P450	1923.83	-2.16052	0.087573	-24.6711	2.18759e-134	3.17066e-132
AGAP004730	AGAP004730	phospholipase A2, venom	19.481	-2.15958	0.395312	-5.46297	4.68228e-08	1.49228e-07
AGAP001111	AGAP001111	nan	471.415	-2.15815	0.204999	-10.5276	6.44399e-26	6.20745e-25
AGAP007400	AGAP007400	nan	755.642	-2.15538	0.185259	-11.6344	2.75536e-31	3.40213e-30
AGAP012320	OBP25	odorant-binding protein 25	77.2698	-2.15452	0.258403	-8.33783	7.56694e-17	4.64115e-16
AGAP000419	nan	nan	29.8117	-2.15426	0.355424	-6.06109	1.35205e-09	5.02273e-09
AGAP007843	nan	nan	2508.83	-2.14693	0.101145	-21.2262	5.47093e-100	4.5212e-98
AGAP001264	AGAP001264	Plasma glutamate carboxypeptidase	9682.14	-2.13908	0.142255	-15.037	4.20384e-51	1.00775e-49	Granulocytes
AGAP028393	ssu rRNA	nan	17124.1	-2.13759	0.296531	-7.20866	5.65039e-13	2.71455e-12
AGAP000300	AGAP000300	Bifunctional pyrimidine biosynthesis protein (PyrABCN)	3883.63	-2.13417	0.0795499	-26.828	1.52274e-158	2.9887e-156
AGAP000881	AGAP000881	aldehyde dehydrogenase family 7 member A1	4456.34	-2.1331	0.071615	-29.7857	5.99315e-195	1.88205e-192	Granulocytes
AGAP002620	MISO	mating-induced stimulator of oogenesis MISO	13.3059	-2.12716	0.449436	-4.73296	2.21264e-06	5.95579e-06
AGAP001650	AGAP001650	cation transport regulator-like protein 2	1404.1	-2.12474	0.200245	-10.6107	2.65818e-26	2.61406e-25
AGAP009285	AGAP009285	nan	575.172	-2.12378	0.170301	-12.4708	1.07776e-35	1.56209e-34
AGAP028491	AQP2	aquaporin	2622.5	-2.12326	0.228716	-9.28341	1.64145e-20	1.23318e-19
AGAP003931	AGAP003931	nan	89.0536	-2.12051	0.210875	-10.0557	8.66738e-24	7.57471e-23
AGAP006009	CPR30	cuticular protein RR-1 family 30	17.0728	-2.11969	0.378692	-5.59739	2.176e-08	7.16284e-08
AGAP008113	AGAP008113	nan	1100.17	-2.11959	0.213868	-9.91072	3.73952e-23	3.16817e-22
AGAP000834	AGAP000834	nan	15.6386	-2.1181	0.425771	-4.97474	6.53363e-07	1.85962e-06
AGAP012900	AGAP012900	nan	109.394	-2.11367	0.296375	-7.13175	9.91026e-13	4.6729e-12
AGAP028653	AGAP028653	nan	16.7095	-2.11357	0.402794	-5.24729	1.54356e-07	4.67583e-07
AGAP012223	nan	nan	428.888	-2.11203	0.171925	-12.2846	1.09582e-34	1.52267e-33
AGAP012034	AGAP012034	nan	298.621	-2.11052	0.259475	-8.13381	4.15994e-16	2.45556e-15
AGAP004742	AGAP004742	Pyruvate carboxylase [Source:UniProtKB/TrEMBL;Acc:A7UUW7]	9558.43	-2.1064	0.159729	-13.1874	1.03766e-39	1.71205e-38	AM granulocytes
AGAP010066	AGAP010066	nan	558.2	-2.10475	0.256192	-8.21555	2.11199e-16	1.26491e-15
AGAP028470	AGAP028470	nan	8.91645	-2.10349	0.55609	-3.78265	0.000155167	0.000334515
AGAP006821	AGAP006821	acetyl-CoA acyltransferase 2	7478.76	-2.09885	0.190087	-11.0415	2.40893e-28	2.60557e-27
AGAP013078	AGAP013078	Plasma glutamate carboxypeptidase precursor	71.6591	-2.09719	0.22161	-9.46344	2.97979e-21	2.32968e-20
AGAP001991	nan	nan	10.2003	-2.09478	0.585959	-3.57496	0.000350277	0.00071707
AGAP007315	AGAP007315	nan	753.193	-2.09398	0.206528	-10.139	3.71041e-24	3.30083e-23
AGAP004700	AGAP004700	nan	416.745	-2.09314	0.248225	-8.43244	3.38527e-17	2.12476e-16
AGAP000130	nan	nan	5.44505	-2.09234	0.598709	-3.49476	0.000474493	0.000953743
AGAP006278	AGAP006278	nan	13581.2	-2.08652	0.0655034	-31.8537	1.17088e-222	5.25279e-220	Granulocytes
AGAP008967	AGAP008967	calcium/calmodulin-dependent 3',5'-cyclic nucleotide phosphodiesterase	107.393	-2.08626	0.292388	-7.13525	9.66081e-13	4.55756e-12
AGAP013192	AGAP013192	venom allergen	17.022	-2.0855	0.386398	-5.39728	6.76602e-08	2.11911e-07
AGAP005586	AGAP005586	nan	11.182	-2.08549	0.568804	-3.66644	0.000245949	0.00051571
AGAP012006	AGAP012006	Protein phosphatase 1 regulatory subunit 16A [Source:UniProtKB/TrEMBL;Acc:A0A1S4H860]	173.707	-2.08427	0.180162	-11.5688	5.92785e-31	7.20598e-30
AGAP004890	AGAP004890	ribose-phosphate pyrophosphokinase	8852.93	-2.08381	0.157976	-13.1907	9.92841e-40	1.64386e-38
AGAP012435	AGAP012435	nan	15.6198	-2.0834	0.38352	-5.43231	5.56293e-08	1.7569e-07
AGAP000629	AGAP000629	nan	23.8618	-2.08325	0.323483	-6.44007	1.19419e-10	4.85561e-10
AGAP008717	AGAP008717	hydroxymethylglutaryl-CoA lyase	520.616	-2.08242	0.179323	-11.6126	3.55499e-31	4.36088e-30
AGAP000090	AGAP000090	adenylate cyclase	1948.6	-2.0803	0.207022	-10.0487	9.31266e-24	8.12248e-23
AGAP003167	AGAP003167	NAD(P) transhydrogenase	1535.81	-2.08027	0.117787	-17.6612	8.34232e-70	3.35868e-68
AGAP002992	AGAP002992	Carbonic anhydrase [Source:UniProtKB/TrEMBL;Acc:Q5TU56]	1392.54	-2.07947	0.196805	-10.5661	4.27788e-26	4.15913e-25
AGAP011518	AGAP011518	nan	24.3271	-2.07731	0.388351	-5.34905	8.84174e-08	2.73917e-07
AGAP008051	SAP1	sensory appendage protein 1	5638.93	-2.07651	0.210482	-9.8655	5.87431e-23	4.92804e-22
AGAP005507	nSyb	synaptic vesicle-associated integral membrane protein	79.0112	-2.07477	0.180969	-11.4648	1.98279e-30	2.37355e-29
AGAP006512	nan	nan	110.44	-2.07406	0.28434	-7.2943	3.00213e-13	1.46015e-12
AGAP009433	AGAP009433	arylformamidase	907.898	-2.07304	0.293748	-7.05721	1.6988e-12	7.89173e-12
AGAP001936	AGAP001936	phosphatidylinositol phospholipase C, beta	237.608	-2.07205	0.188497	-10.9925	4.15409e-28	4.43212e-27
AGAP000129	AGAP000129	nan	69.6383	-2.07198	0.199393	-10.3915	2.71112e-25	2.55415e-24
AGAP013443	AGAP013443	Plasma glutamate carboxypeptidase	108.12	-2.07193	0.169336	-12.2356	2.00547e-34	2.77031e-33
AGAP006132	AGAP006132	ganglioside-induced differentiation-associated-protein 1	111.531	-2.07021	0.17523	-11.8143	3.29319e-32	4.19826e-31
AGAP002632	AGAP002632	nan	10674.1	-2.06829	0.243135	-8.50675	1.7888e-17	1.1433e-16	AM granulocytes
AGAP006731	nan	nan	8.65256	-2.06682	0.516148	-4.00432	6.21956e-05	0.000141294
AGAP003283	AGAP003283	atrial natriuretic peptide receptor A	24.3288	-2.06632	0.336914	-6.13307	8.61977e-10	3.26525e-09
AGAP005865	AGAP005865	fumarylacetoacetase	3370.03	-2.06305	0.128761	-16.0223	8.92832e-58	2.67028e-56	Oenocytoids
AGAP010367	nan	nan	140.777	-2.06217	0.222915	-9.25093	2.22549e-20	1.66268e-19
AGAP007636	AGAP007636	phosphatidate phosphatase LPIN	2381.54	-2.06211	0.166396	-12.3928	2.85874e-35	4.09304e-34
AGAP011317	AGAP011317	nan	7508.69	-2.06148	0.217822	-9.46408	2.96155e-21	2.31926e-20
AGAP006908	AGAP006908	nan	276.466	-2.06019	0.211393	-9.74579	1.92275e-22	1.57378e-21
AGAP002194	AGAP002194	1D-myo-inositol-triphosphate 3-kinase	1155.23	-2.06007	0.0835698	-24.6509	3.59952e-134	5.13804e-132
AGAP011062	AGAP011062	GLOBIN domain-containing protein [Source:UniProtKB/TrEMBL;Acc:Q2MCN9]	35.0197	-2.05995	0.24939	-8.25997	1.45708e-16	8.77695e-16
AGAP005183	AGAP005183	nan	451.148	-2.05748	0.232424	-8.85226	8.57642e-19	5.84226e-18
AGAP000249	AGAP000249	mannosyl-glycoprotein endo-beta-N-acetylglucosaminidase	24190.4	-2.05668	0.160733	-12.7957	1.73325e-37	2.67687e-36	Oenocytoids
AGAP009417	AGAP009417	nan	7.27352	-2.05299	0.571853	-3.59006	0.0003306	0.000679001
AGAP004232	AGAP004232	pellino	1462.75	-2.05092	0.257981	-7.94988	1.86699e-15	1.06149e-14
AGAP009648	AGAP009648	2-oxo-4-hydroxy-4-carboxy-5-ureidoimidazoline decarboxylase	1149.89	-2.04692	0.228864	-8.94382	3.75945e-19	2.62743e-18
AGAP001690	AGAP001690	nan	12.1928	-2.04668	0.432377	-4.73355	2.20626e-06	5.94031e-06
AGAP002378	AGAP002378	Adenylosuccinate lyase [Source:UniProtKB/TrEMBL;Acc:Q7QBZ6]	3550.03	-2.04606	0.20439	-10.0106	1.36952e-23	1.18045e-22
AGAP000768	AGAP000768	Septin 4 [Source:UniProtKB/TrEMBL;Acc:A0A1S4G9T6]	54.7214	-2.04275	0.212687	-9.6045	7.65258e-22	6.1778e-21
AGAP001257	AGAP001257	UTP--glucose-1-phosphate uridylyltransferase	7912.21	-2.04167	0.156044	-13.0839	4.06898e-39	6.63215e-38
AGAP003239	AGAP003239	nan	593.849	-2.04135	0.256061	-7.97212	1.55975e-15	8.89495e-15
AGAP000806	AGAP000806	Angiopoietin-like 1	4950.15	-2.03911	0.0943973	-21.6013	1.74609e-103	1.59708e-101
AGAP008138	AGAP008138	nan	8.29291	-2.03891	0.541356	-3.7663	0.000165684	0.000355723
AGAP007757	AGAP007757	Gustatory receptor [Source:UniProtKB/TrEMBL;Acc:Q7PIY0]	42.4383	-2.03888	0.281443	-7.24436	4.34501e-13	2.10027e-12
AGAP002068	AGAP002068	nan	111.485	-2.03438	0.265352	-7.66674	1.76426e-14	9.3693e-14
AGAP009786	AGAP009786	phosphoribosylamine--glycine ligase / phosphoribosylglycinamide formyltransfer	3517.44	-2.03431	0.179408	-11.339	8.4086e-30	9.75583e-29
AGAP000481	AGAP000481	cyanogenic beta-glucosidase	308.243	-2.03376	0.181868	-11.1826	4.96101e-29	5.54421e-28
AGAP007304	AGAP007304	nan	12.5422	-2.0308	0.459008	-4.42433	9.67432e-06	2.41499e-05
AGAP001065	AGAP001065	glycine hydroxymethyltransferase	6907.61	-2.03051	0.187408	-10.8348	2.35607e-27	2.43383e-26
AGAP010733	AGAP010733	Vanin-like protein 1	976.75	-2.02391	0.178316	-11.3501	7.40834e-30	8.60592e-29
AGAP012557	AGAP012557	nan	141.643	-2.02057	0.179308	-11.2687	1.87319e-29	2.12875e-28
AGAP000366	AGAP000366	nan	21.0536	-2.01884	0.38065	-5.30365	1.1351e-07	3.47765e-07
AGAP000198	Cht5-5	Chitinase [Source:UniProtKB/TrEMBL;Acc:A0A1S4G846]	8.17446	-2.01748	0.517292	-3.90008	9.61601e-05	0.00021351
AGAP003586	AGAP003586	Phosphate carrier, mitochondrial	5065.7	-2.01727	0.24323	-8.29368	1.09798e-16	6.6693e-16
AGAP003141	AGAP003141	Insulin-related peptide binding protein	349.295	-2.01487	0.176192	-11.4357	2.77389e-30	3.30377e-29
AGAP010042	AGAP010042	solute carrier organic anion transporter family member	21.0389	-2.01317	0.32545	-6.1858	6.17889e-10	2.36631e-09
AGAP001515	AGAP001515	nan	423.015	-2.01226	0.251172	-8.01148	1.13334e-15	6.52239e-15
AGAP001200	AGAP001200	glycogen debranching enzyme	2019.46	-2.00816	0.189362	-10.6049	2.82763e-26	2.77338e-25
AGAP004793	AGAP004793	ornithine--oxo-acid transaminase	92.9538	-2.00635	0.209228	-9.58931	8.86788e-22	7.14054e-21
AGAP005662	AGAP005662	acyl-CoA dehydrogenase	10248.1	-2.00476	0.177002	-11.3262	9.73147e-30	1.12079e-28
AGAP006513	nan	nan	210.228	-2.00408	0.176359	-11.3636	6.3446e-30	7.39758e-29
AGAP002429	CYP314A1	cytochrome P450	38.4907	-2.00337	0.2933	-6.83044	8.46568e-12	3.74437e-11
AGAP001550	AGAP001550	sodium-coupled monocarboxylate transporter 1	198.112	-2.00136	0.224886	-8.89945	5.61224e-19	3.87631e-18
