# Supplementary material for: Hemocyte differentiation to the megacyte lineage enhances mosquito immunity against Plasmodium
Source: eLife. 2022 Sep 2;11:e81116. doi: 10.7554/eLife.81116 (PMC9545522; doi:10.7554/eLife.81116)
Supplement: Supplementary file 3. [file elife-81116-supp3.xlsx]

## Sheet: Sheet1
Toll pathway upregulated genes in Cactus-silenced hemocytes
Accesion Number	Name	Description	baseMean	log2FoldChange	lfcSE	stat	pvalue	padj
AGAP002842	AGAP002842	CLIPD1 protein	908.023	9.35827	0.461471	20.2792	1.96213e-91	1.31101e-89
AGAP001002	AGAP001002	Toll protein	116128	6.17763	0.268236	23.0306	2.30373e-117	2.78249e-115
AGAP010833	CLIPB14	CLIP-domain serine protease	350.173	5.6093	0.696699	8.05126	8.19441e-16	4.75953e-15
AGAP010816	TEP3	thioester-containing protein 3	62660.7	4.1535	0.220729	18.8172	5.45532e-79	2.90365e-77
AGAP001004	TOLL1A	TOLL-like receptor 1A	757.491	4.10594	0.211677	19.3972	8.1483e-84	4.95259e-82
AGAP001376	SRPN17	serine protease inhibitor (serpin) 17	2134.99	3.68553	0.244477	15.0751	2.36029e-51	5.67252e-50
AGAP003139	SRPN9	serine protease inhibitor (serpin) 9	3098.84	3.52852	0.121724	28.9878	9.37261e-185	2.67574e-182
AGAP006343	PGRPS2	peptidoglycan recognition protein (short)	19.3625	3.50921	0.504348	6.95791	3.45357e-12	1.57179e-11
AGAP001648	CLIPB17	CLIP-domain serine protease	9264.85	3.29032	0.308997	10.6484	1.7745e-26	1.7542e-25
AGAP003249	CLIPB3	CLIP-domain serine protease	699.185	3.05082	0.238996	12.7651	2.56687e-37	3.93211e-36
AGAP008366	TEP2	thioester-containing protein 2	2622.05	2.94334	0.0858671	34.2779	1.67542e-257	1.57841e-254
AGAP011294	DEF1	defensin anti-microbial peptide	9881.82	2.92236	0.525344	5.56276	2.65544e-08	8.64739e-08
AGAP009212	SRPN6	serine protease inhibitor (serpin) 6	4770.19	2.89615	0.163757	17.6857	5.40539e-70	2.20451e-68
AGAP006342	PGRPS3	peptidoglycan recognition protein (short)	17.7498	2.72904	0.702853	3.8828	0.000103258	0.00022841
AGAP005246	SRPN10	serine protease inhibitor (serpin) 10	11070.9	2.62864	0.0862374	30.4814	4.59662e-204	1.60388e-201
AGAP007036	APL1A	Anopheles Plasmodium-responsive Leucine-Rich Repeat 1A	1456.48	2.62365	0.264571	9.91663	3.52463e-23	2.9888e-22
AGAP013027	AGAP013027	Protein toll	9828.82	2.61168	0.210978	12.3789	3.39845e-35	4.84369e-34
AGAP003247	CLIPB19	CLIP-domain serine protease	1759.95	2.5704	0.274299	9.37078	7.1998e-21	5.51458e-20
AGAP002270	CLIPB7	CLIP-domain serine protease	659.569	2.50762	0.252318	9.93832	2.83566e-23	2.41543e-22
AGAP007035	APL1B	Anopheles Plasmodium-responsive Leucine-Rich Repeat 1B	1019.49	2.44376	0.276147	8.84949	8.79215e-19	5.98057e-18
AGAP013184	CLIPB36	CLIP-domain serine protease	1066.01	2.42672	0.273968	8.85767	8.17053e-19	5.57787e-18
AGAP007033	APL1C	Anopheles Plasmodium-responsive Leucine-Rich Repeat 1C	11735.2	2.40731	0.261413	9.20884	3.29675e-20	2.4398e-19
AGAP008835	CLIPC1	CLIP-domain serine protease	35.0536	2.33882	0.339892	6.88106	5.94078e-12	2.65882e-11
AGAP002811	CLIPD4	CLIP-domain serine protease [Source:UniProtKB/TrEMBL;Acc:A0A1S4GG73]	16.5154	2.26326	0.377785	5.99086	2.0874e-09	7.61634e-09
AGAP011790	CLIPA2	CLIP-domain serine protease	3495.72	2.21426	0.266506	8.30847	9.69428e-17	5.90749e-16
AGAP009221	SRPN5	serine protease inhibitor (serpin) 5	2214.44	2.04735	0.17424	11.7502	7.04678e-32	8.83991e-31
AGAP003689	CLIPC7	CLIP-domain serine protease [Source:UniProtKB/TrEMBL;Acc:A0A1S4GIW4]	1211.44	2.04099	0.356864	5.71923	1.0701e-08	3.62771e-08
